# Supplementary material for: Acid-catalyzed transformation of cassane diterpenoids from Caesalpinia bonduc to aromatic derivatives
Source: Royal Society of Chemistry journal article supplement (doi:10.1039/d1ra03636j), 2021-01-01
Supplement: d1ra03636j1.pdf [file d1ra03636j1.pdf]

**Supplementary Information for**

**Acid-catalyzed transformation of cassane diterpenoids from *Ceasalpinia bonduc* to aromatic derivatives**

Ting Liu,<sup>a,b</sup> Zunxi Ning,<sup>a,b</sup> Yan Yin,<sup>a,b</sup> Shizhou Qi,<sup>a,b</sup> and Huiyuan Gao<sup>a,b,\*</sup>

<sup>a</sup> *School of Traditional Chinese Materia Medica, Shenyang Pharmaceutical University, Shenyang 110016, People's Republic of China*

<sup>b</sup> *Key Laboratory of Structure-Based Drug Design & Discovery of Ministry of Education, Shenyang Pharmaceutical University, Shenyang 110016, People's Republic of China*

---

\* Corresponding author: Huiyuan Gao, School of Traditional Chinese Materia Medica, Shenyang Pharmaceutical University, Shenyang, 110016, People's Republic of China, E-mail: [sypugaohy@163.com](mailto:sypugaohy@163.com), Tel: +86-024-43520781.

| Contents                                                                                                 | Page |
|----------------------------------------------------------------------------------------------------------|------|
| <b>Figure S1.</b> Structures of compounds <b>9-11</b> .                                                  | 5    |
| <b>Figure S2.</b> $^1\text{H}$ NMR (600 MHz, $\text{CD}_3\text{OD}$ ) spectrum of compound <b>1</b>      | 6    |
| <b>Figure S3.</b> $^{13}\text{C}$ NMR (150 MHz, $\text{CD}_3\text{OD}$ ) spectrum of compound <b>1</b>   | 6    |
| <b>Figure S4.</b> HRESIMS spectrum of compound <b>1</b>                                                  | 7    |
| <b>Figure S5.</b> $^1\text{H}$ NMR (600 MHz, $\text{CDCl}_3$ ) spectrum of compound <b>1a</b>            | 7    |
| <b>Figure S6.</b> $^{13}\text{C}$ NMR (150 MHz, $\text{CDCl}_3$ ) spectrum of compound <b>1a</b>         | 8    |
| <b>Figure S7.</b> HSQC (600 MHz, $\text{CDCl}_3$ ) spectrum of compound <b>1a</b>                        | 8    |
| <b>Figure S8.</b> HMBC (600 MHz, $\text{CDCl}_3$ ) spectrum of compound <b>1a</b>                        | 9    |
| <b>Figure S9.</b> NOESY (600 MHz, $\text{CDCl}_3$ ) spectrum of compound <b>1a</b>                       | 9    |
| <b>Figure S10.</b> HRESIMS spectrum of compound <b>1a</b>                                                | 10   |
| <b>Figure S11.</b> $^1\text{H}$ NMR (600 MHz, $\text{CD}_3\text{OD}$ ) spectrum of compound <b>2</b>     | 10   |
| <b>Figure S12.</b> $^{13}\text{C}$ NMR (150 MHz, $\text{CD}_3\text{OD}$ ) spectrum of compound <b>2</b>  | 11   |
| <b>Figure S13.</b> $^1\text{H}$ NMR (400 MHz, $\text{CDCl}_3$ ) spectrum of compound <b>2</b>            | 11   |
| <b>Figure S14.</b> $^{13}\text{C}$ NMR (100 MHz, $\text{CDCl}_3$ ) spectrum of compound <b>2</b>         | 12   |
| <b>Figure S15.</b> $^1\text{H}$ NMR (600 MHz, $\text{CDCl}_3$ ) spectrum of compound <b>2a</b>           | 12   |
| <b>Figure S16.</b> $^{13}\text{C}$ NMR (150 MHz, $\text{CDCl}_3$ ) spectrum of compound <b>2a</b>        | 13   |
| <b>Figure S17.</b> $^1\text{H}$ NMR (600 MHz, $\text{CD}_3\text{OD}$ ) spectrum of compound <b>2b</b>    | 13   |
| <b>Figure S18.</b> $^{13}\text{C}$ NMR (150 MHz, $\text{CD}_3\text{OD}$ ) spectrum of compound <b>2b</b> | 14   |
| <b>Figure S19.</b> NOESY (600 MHz, $\text{CD}_3\text{OD}$ ) spectrum of compound <b>2b</b>               | 14   |
| <b>Figure S20.</b> HRESIMS spectrum of compound <b>2b</b>                                                | 15   |
| <b>Figure S21.</b> $^1\text{H}$ NMR (600 MHz, $\text{CD}_3\text{OD}$ ) spectrum of compound <b>2c</b>    | 15   |
| <b>Figure S22.</b> $^{13}\text{C}$ NMR (150 MHz, $\text{CD}_3\text{OD}$ ) spectrum of compound <b>2c</b> | 16   |
| <b>Figure S23.</b> $^1\text{H}$ NMR (600 MHz, $\text{CD}_3\text{OD}$ ) spectrum of compound <b>3</b>     | 16   |
| <b>Figure S24.</b> $^{13}\text{C}$ NMR (150 MHz, $\text{CD}_3\text{OD}$ ) spectrum of compound <b>3</b>  | 17   |
| <b>Figure S25.</b> $^1\text{H}$ NMR (600 MHz, $\text{CDCl}_3$ ) spectrum of compound <b>3a</b>           | 17   |
| <b>Figure S26.</b> $^{13}\text{C}$ NMR (150 MHz, $\text{CDCl}_3$ ) spectrum of compound <b>3a</b>        | 18   |

---

|                                                                                                          |    |
|----------------------------------------------------------------------------------------------------------|----|
| <b>Figure S27.</b> $^1\text{H}$ NMR (600 MHz, $\text{CD}_3\text{OD}$ ) spectrum of compound <b>3b</b>    | 18 |
| <b>Figure S28.</b> $^{13}\text{C}$ NMR (150 MHz, $\text{CD}_3\text{OD}$ ) spectrum of compound <b>3b</b> | 19 |
| <b>Figure S29.</b> HSQC (600 MHz, $\text{CD}_3\text{OD}$ ) spectrum of compound <b>3b</b>                | 19 |
| <b>Figure S30.</b> HMBC (600 MHz, $\text{CD}_3\text{OD}$ ) spectrum of compound <b>3b</b>                | 20 |
| <b>Figure S31.</b> NOESY (600 MHz, $\text{CD}_3\text{OD}$ ) spectrum of compound <b>3b</b>               | 20 |
| <b>Figure S32.</b> HRESIMS spectrum of compound <b>3b</b>                                                | 21 |
| <b>Figure S33.</b> $^1\text{H}$ NMR (600 MHz, $\text{CD}_3\text{OD}$ ) spectrum of compound <b>3c</b>    | 21 |
| <b>Figure S34.</b> $^{13}\text{C}$ NMR (150 MHz, $\text{CD}_3\text{OD}$ ) spectrum of compound <b>3c</b> | 22 |
| <b>Figure S35.</b> $^1\text{H}$ NMR (600 MHz, $\text{CD}_3\text{OD}$ ) spectrum of compound <b>4</b>     | 22 |
| <b>Figure S36.</b> $^{13}\text{C}$ NMR (150 MHz, $\text{CD}_3\text{OD}$ ) spectrum of compound <b>4</b>  | 23 |
| <b>Figure S37.</b> $^1\text{H}$ NMR (600 MHz, $\text{CD}_3\text{OD}$ ) spectrum of compound <b>5</b>     | 23 |
| <b>Figure S38.</b> $^1\text{H}$ NMR (400 MHz, $\text{CDCl}_3$ ) spectrum of compound <b>5</b>            | 24 |
| <b>Figure S39.</b> $^{13}\text{C}$ NMR (150 MHz, $\text{CD}_3\text{OD}$ ) spectrum of compound <b>5</b>  | 24 |
| <b>Figure S40.</b> $^1\text{H}$ NMR (400 MHz, $\text{CDCl}_3$ ) spectrum of compound <b>5a</b>           | 25 |
| <b>Figure S41.</b> $^{13}\text{C}$ NMR (100 MHz, $\text{CDCl}_3$ ) spectrum of compound <b>5a</b>        | 25 |
| <b>Figure S42.</b> $^1\text{H}$ NMR (600 MHz, $\text{CD}_3\text{OD}$ ) spectrum of compound <b>5b</b>    | 26 |
| <b>Figure S43.</b> $^{13}\text{C}$ NMR (150 MHz, $\text{CD}_3\text{OD}$ ) spectrum of compound <b>5b</b> | 26 |
| <b>Figure S44.</b> $^1\text{H}$ NMR (600 MHz, $\text{CD}_3\text{OD}$ ) spectrum of compound <b>6</b>     | 27 |
| <b>Figure S45.</b> $^{13}\text{C}$ NMR (150 MHz, $\text{CD}_3\text{OD}$ ) spectrum of compound <b>6</b>  | 27 |
| <b>Figure S46.</b> $^1\text{H}$ NMR (400 MHz, $\text{CDCl}_3$ ) spectrum of compound <b>6a</b>           | 28 |
| <b>Figure S47.</b> $^{13}\text{C}$ NMR (100 MHz, $\text{CDCl}_3$ ) spectrum of compound <b>6a</b>        | 28 |
| <b>Figure S48.</b> $^1\text{H}$ NMR (600 MHz, $\text{CD}_3\text{OD}$ ) spectrum of compound <b>6b</b>    | 29 |
| <b>Figure S49.</b> $^{13}\text{C}$ NMR (150 MHz, $\text{CD}_3\text{OD}$ ) spectrum of compound <b>6b</b> | 29 |
| <b>Figure S50.</b> HSQC (600 MHz, $\text{CD}_3\text{OD}$ ) spectrum of compound <b>6b</b>                | 30 |
| <b>Figure S51.</b> HMBC (600 MHz, $\text{CD}_3\text{OD}$ ) spectrum of compound <b>6b</b>                | 30 |
| <b>Figure S52.</b> NOESY (600 MHz, $\text{CD}_3\text{OD}$ ) spectrum of compound <b>6b</b>               | 31 |
| <b>Figure S53.</b> HRESIMS spectrum of compound <b>6b</b>                                                | 31 |

---

---

|                                                                                                         |    |
|---------------------------------------------------------------------------------------------------------|----|
| <b>Figure S54.</b> $^1\text{H}$ NMR (600 MHz, $\text{CD}_3\text{OD}$ ) spectrum of compound <b>7</b>    | 32 |
| <b>Figure S55.</b> $^{13}\text{C}$ NMR (150 MHz, $\text{CD}_3\text{OD}$ ) spectrum of compound <b>7</b> | 32 |
| <b>Figure S56.</b> $^1\text{H}$ NMR (600 MHz, $\text{CD}_3\text{OD}$ ) spectrum of compound <b>8</b>    | 33 |
| <b>Figure S57.</b> $^{13}\text{C}$ NMR (150 MHz, $\text{CD}_3\text{OD}$ ) spectrum of compound <b>8</b> | 33 |
| <b>Figure S58.</b> $^1\text{H}$ NMR (400 MHz, $\text{CDCl}_3$ ) spectrum of compound <b>8</b>           | 34 |
| <b>Figure S59.</b> $^{13}\text{C}$ NMR (100 MHz, $\text{CDCl}_3$ ) spectrum of compound <b>8</b>        | 34 |
| <b>Figure S60.</b> $^1\text{H}$ NMR (600 MHz, $\text{CDCl}_3$ ) spectrum of compound <b>9</b>           | 35 |
| <b>Figure S61.</b> $^{13}\text{C}$ NMR (150 MHz, $\text{CDCl}_3$ ) spectrum of compound <b>9</b>        | 35 |
| <b>Figure S62.</b> $^1\text{H}$ NMR (400 MHz, $\text{CDCl}_3$ ) spectrum of compound <b>10</b>          | 36 |
| <b>Figure S63.</b> $^{13}\text{C}$ NMR (100 MHz, $\text{CDCl}_3$ ) spectrum of compound <b>10</b>       | 36 |
| <b>Figure S64.</b> $^1\text{H}$ NMR (400 MHz, $\text{CDCl}_3$ ) spectrum of compound <b>11</b>          | 37 |
| <b>Figure S65.</b> $^{13}\text{C}$ NMR (100 MHz, $\text{CDCl}_3$ ) spectrum of compound <b>11</b>       | 37 |

---

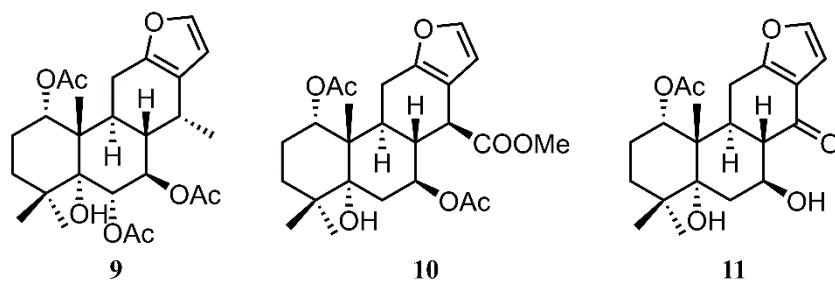

**Figure S1.** Structures of compounds 9-11.

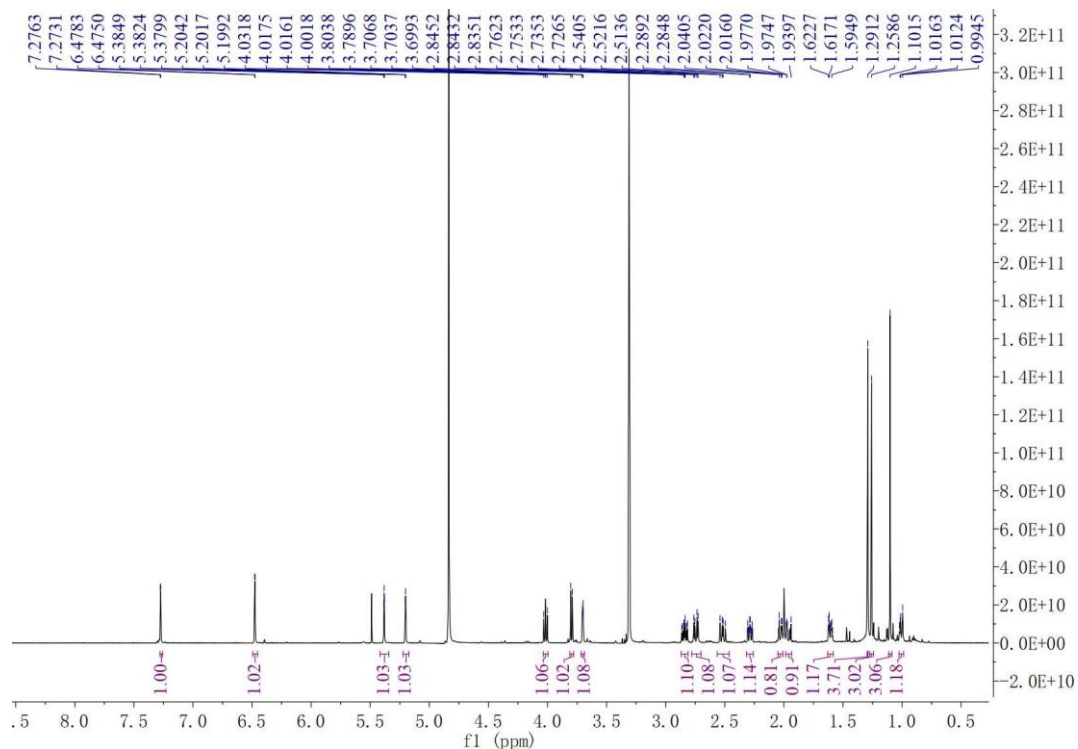

Figure S2.  $^1\text{H}$  NMR (600 MHz,  $\text{CD}_3\text{OD}$ ) spectrum of compound 1

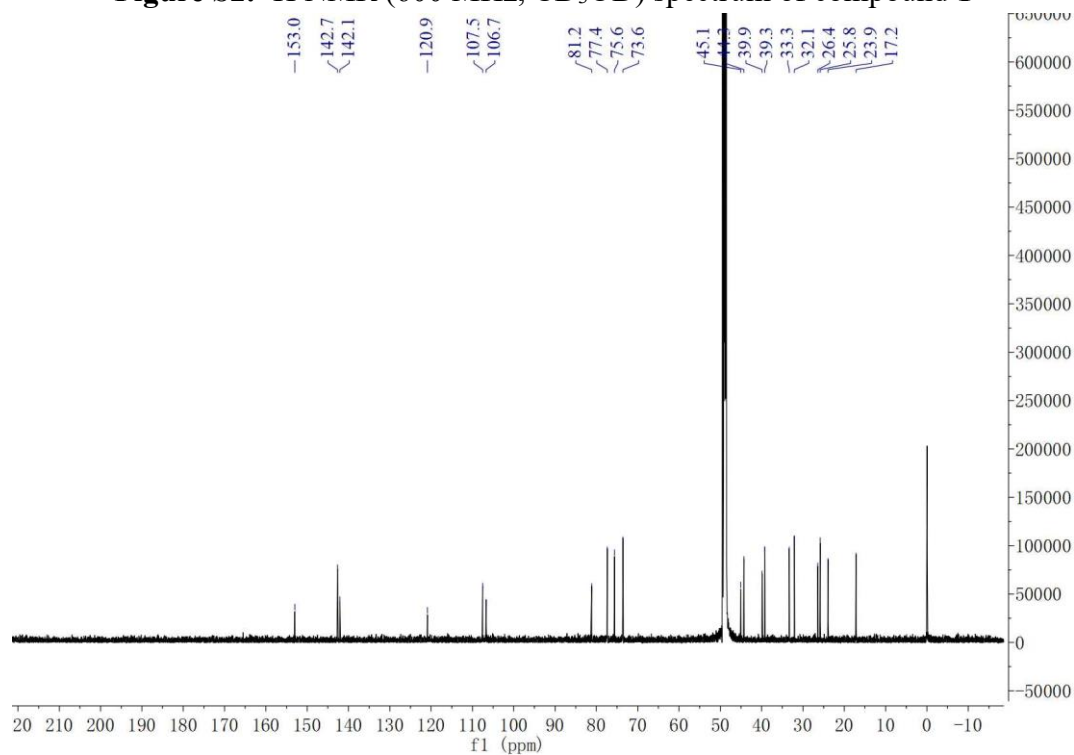

Figure S3.  $^{13}\text{C}$  NMR (150 MHz,  $\text{CD}_3\text{OD}$ ) spectrum of compound 1

| Acquisition Parameter |            |                      |          |                  |           |
|-----------------------|------------|----------------------|----------|------------------|-----------|
| Source Type           | ESI        | Ion Polarity         | Positive | Set Nebulizer    | 1.8 Bar   |
| Focus                 | Not active | Set Capillary        | 4500 V   | Set Dry Heater   | 220 °C    |
| Scan Begin            | 50 m/z     | Set End Plate Offset | -500 V   | Set Dry Gas      | 8.0 l/min |
| Scan End              | 1300 m/z   | Set Charging Voltage | 2000 V   | Set Divert Valve | Waste     |
|                       |            | Set Corona           | 0 nA     | Set APCI Heater  | 0 °C      |

C20H28O5, M+nNa, 371.1829

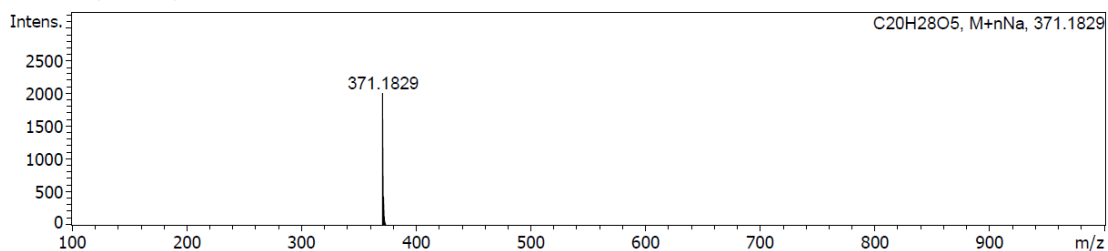

Figure S4. HRESIMS spectrum of compound 1

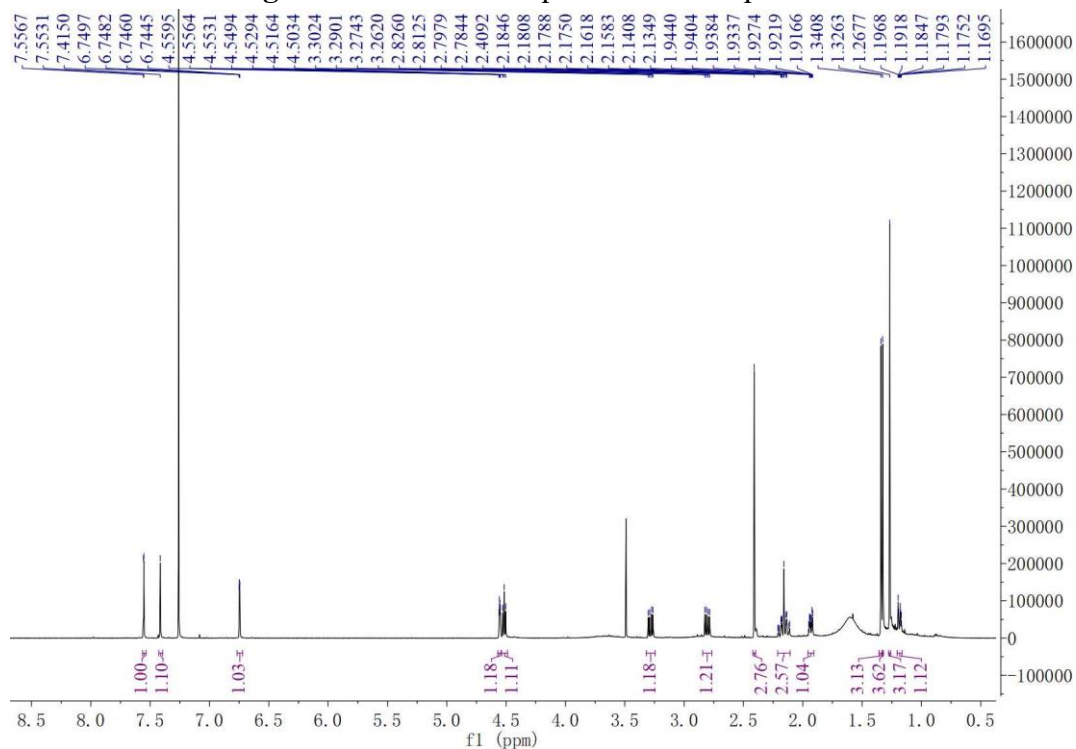

Figure S5. <sup>1</sup>H NMR (600 MHz, CDCl<sub>3</sub>) spectrum of compound 1a

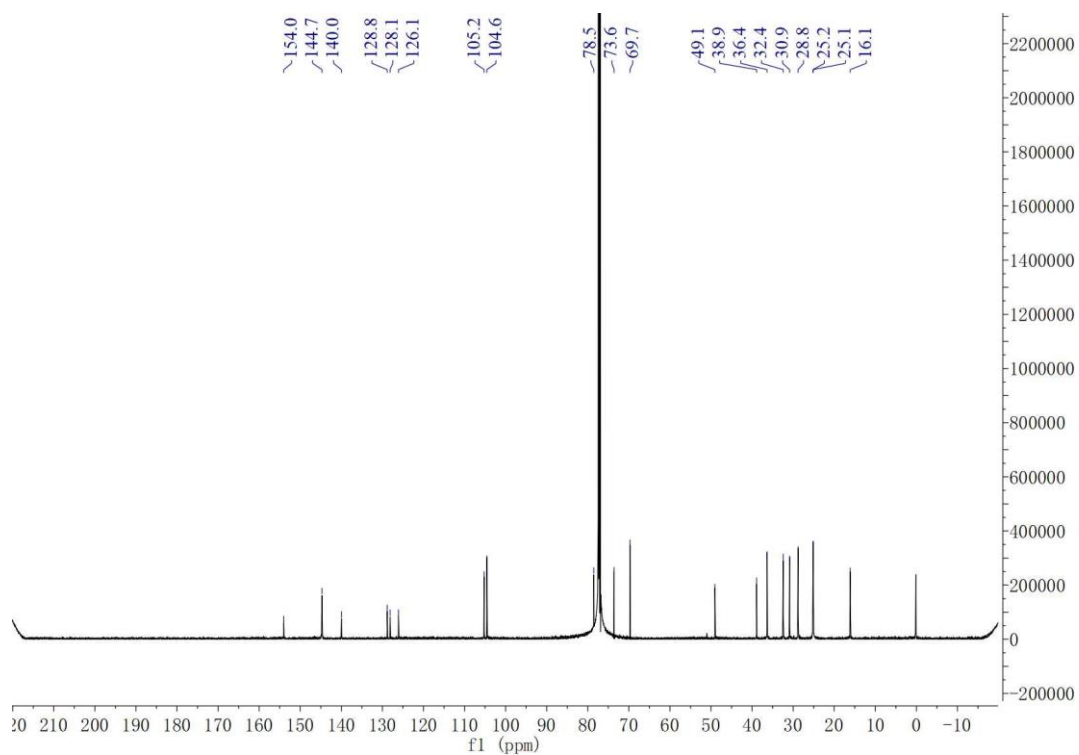

**Figure S6.**  $^{13}\text{C}$  NMR (150 MHz,  $\text{CDCl}_3$ ) spectrum of compound **1a**

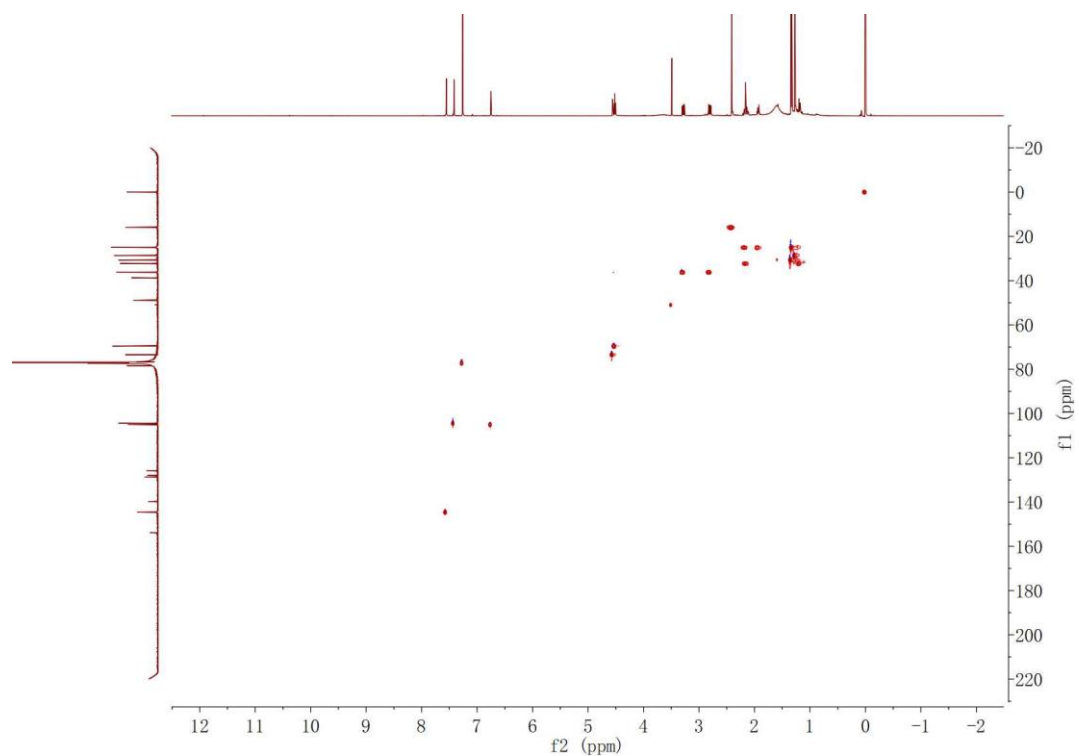

**Figure S7.** HSQC (600 MHz,  $\text{CDCl}_3$ ) spectrum of compound **1a**



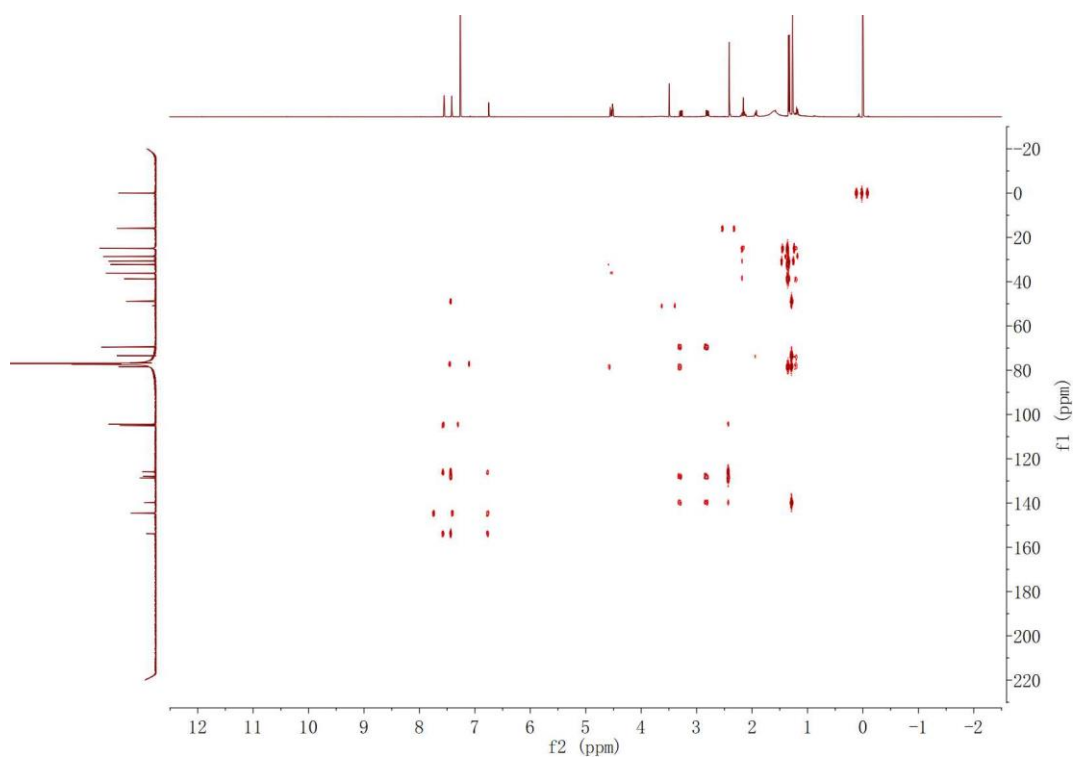

**Figure S8.** HMBC (600 MHz, CDCl<sub>3</sub>) spectrum of compound **1a**

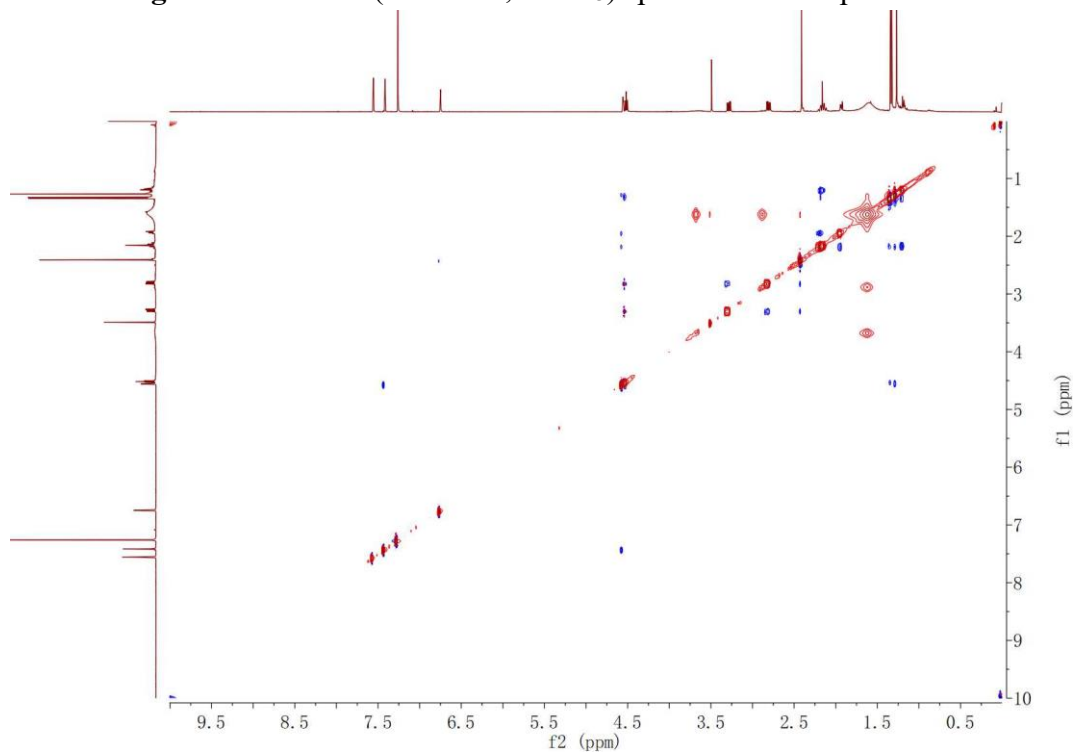

**Figure S9.** NOESY (600 MHz, CDCl<sub>3</sub>) spectrum of compound **1a**

**Acquisition Parameter**

|             |            |                      |          |                  |           |
|-------------|------------|----------------------|----------|------------------|-----------|
| Source Type | ESI        | Ion Polarity         | Positive | Set Nebulizer    | 1.8 Bar   |
| Focus       | Not active | Set Capillary        | 4500 V   | Set Dry Heater   | 220 °C    |
| Scan Begin  | 50 m/z     | Set End Plate Offset | -500 V   | Set Dry Gas      | 8.0 l/min |
| Scan End    | 1300 m/z   | Set Charging Voltage | 2000 V   | Set Divert Valve | Waste     |
|             |            | Set Corona           | 0 nA     | Set APCI Heater  | 0 °C      |

**C20H26O4, M+nNa, 353.1723**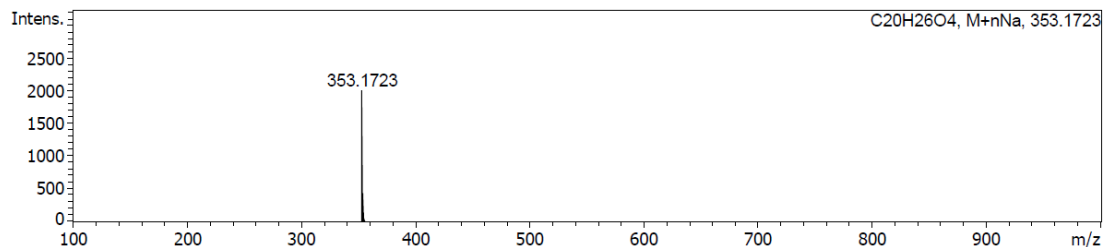**Figure S10. HRESIMS spectrum of compound 1a**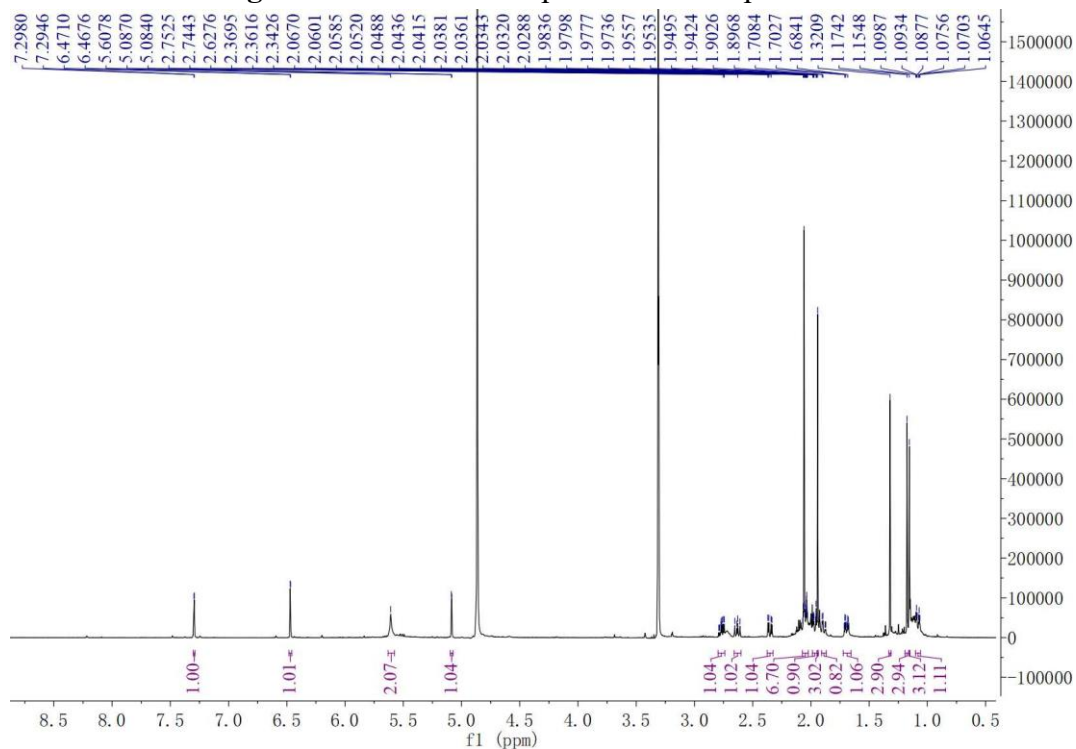**Figure S11. <sup>1</sup>H NMR (600 MHz, CD<sub>3</sub>OD) spectrum of compound 2**

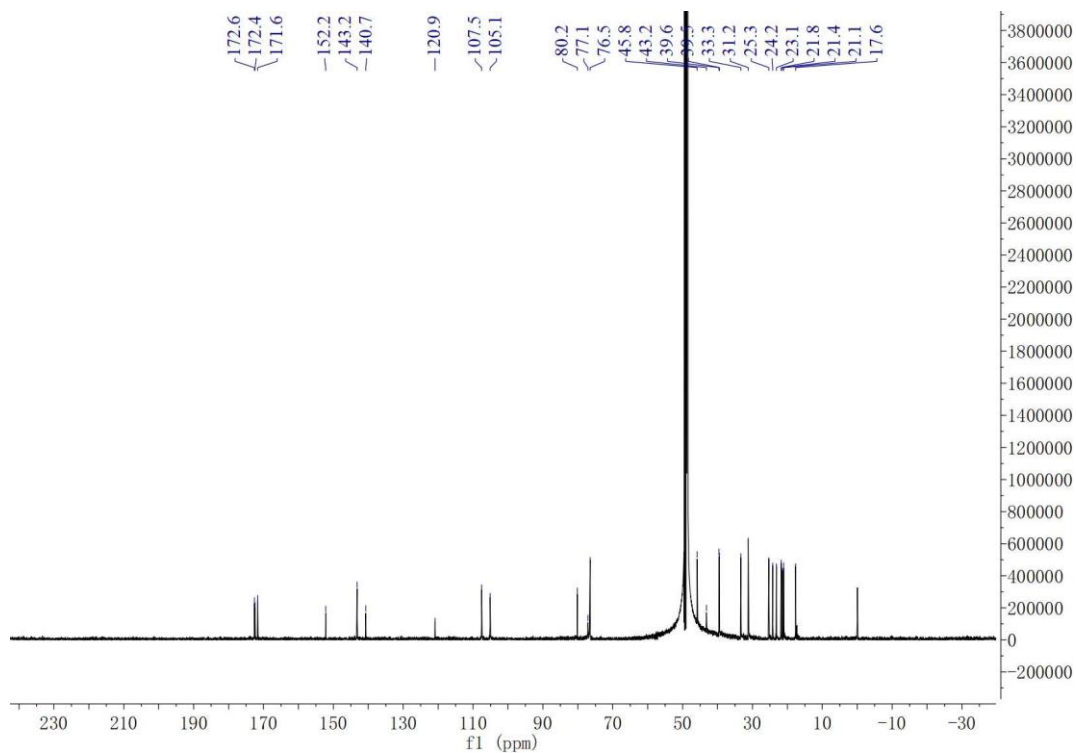

Figure S12.  $^{13}\text{C}$  NMR (150 MHz,  $\text{CD}_3\text{OD}$ ) spectrum of compound **2**

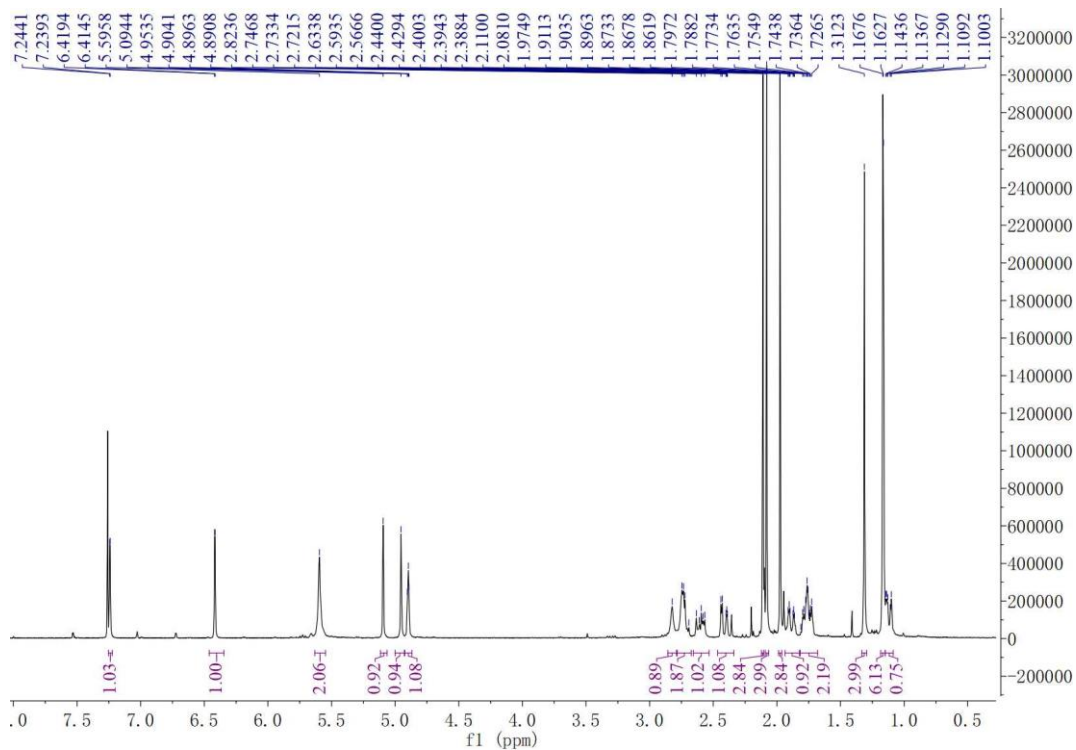

Figure S13.  $^1\text{H}$  NMR (400 MHz,  $\text{CDCl}_3$ ) spectrum of compound **2**

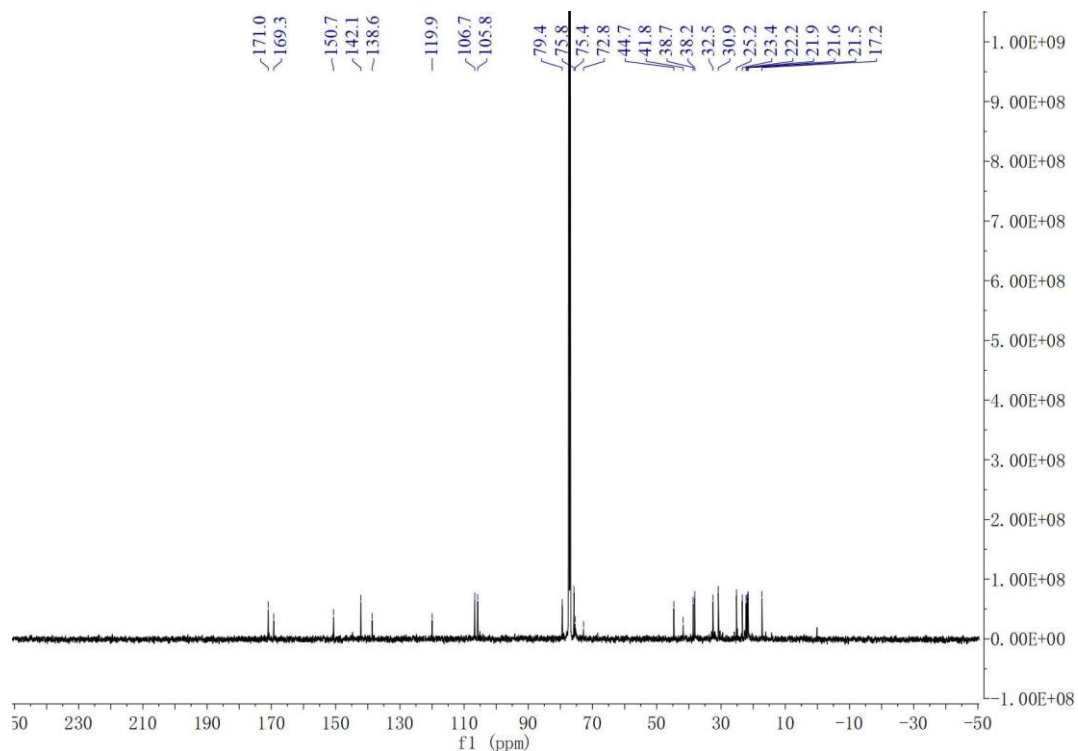

**Figure S14.**  $^{13}\text{C}$  NMR (100 MHz,  $\text{CDCl}_3$ ) spectrum of compound **2**

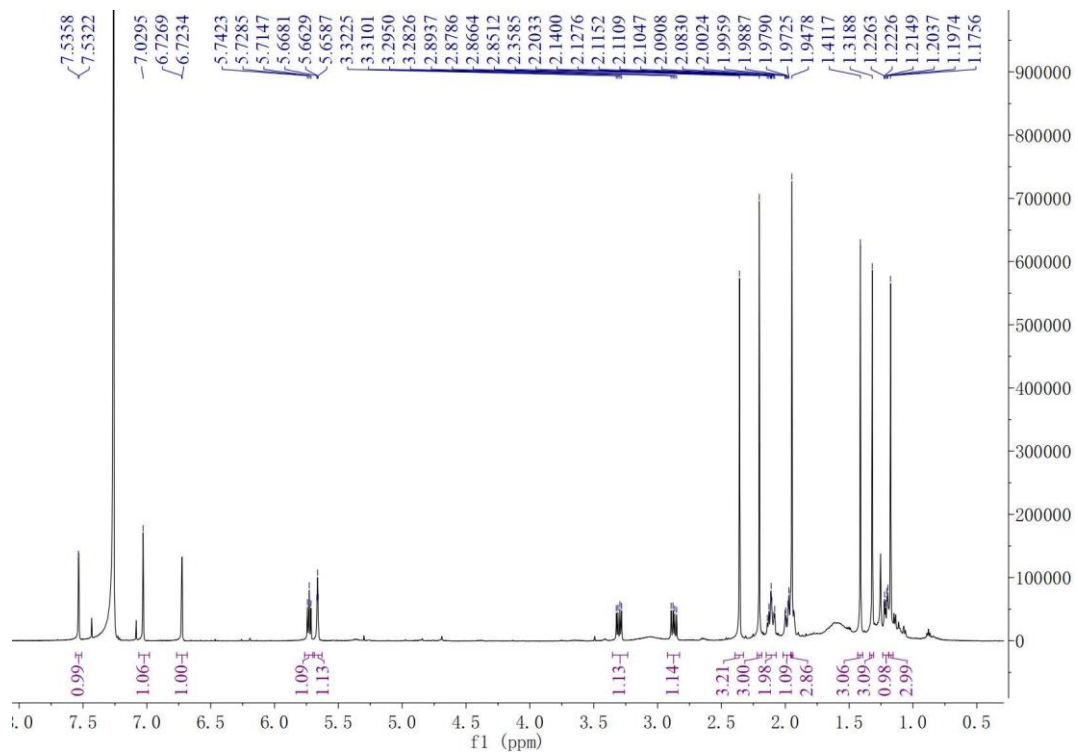

**Figure S15.**  $^1\text{H}$  NMR (600 MHz,  $\text{CDCl}_3$ ) spectrum of compound **2a**

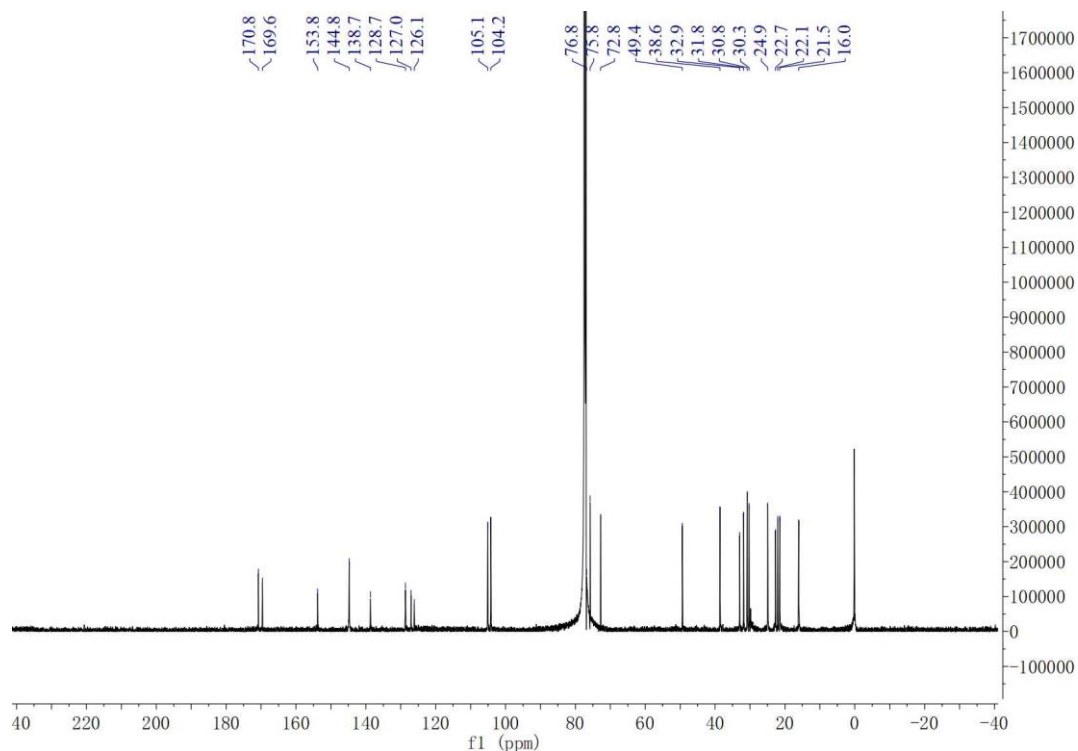

Figure S16.  $^{13}\text{C}$  NMR (150 MHz,  $\text{CDCl}_3$ ) spectrum of compound **2a**

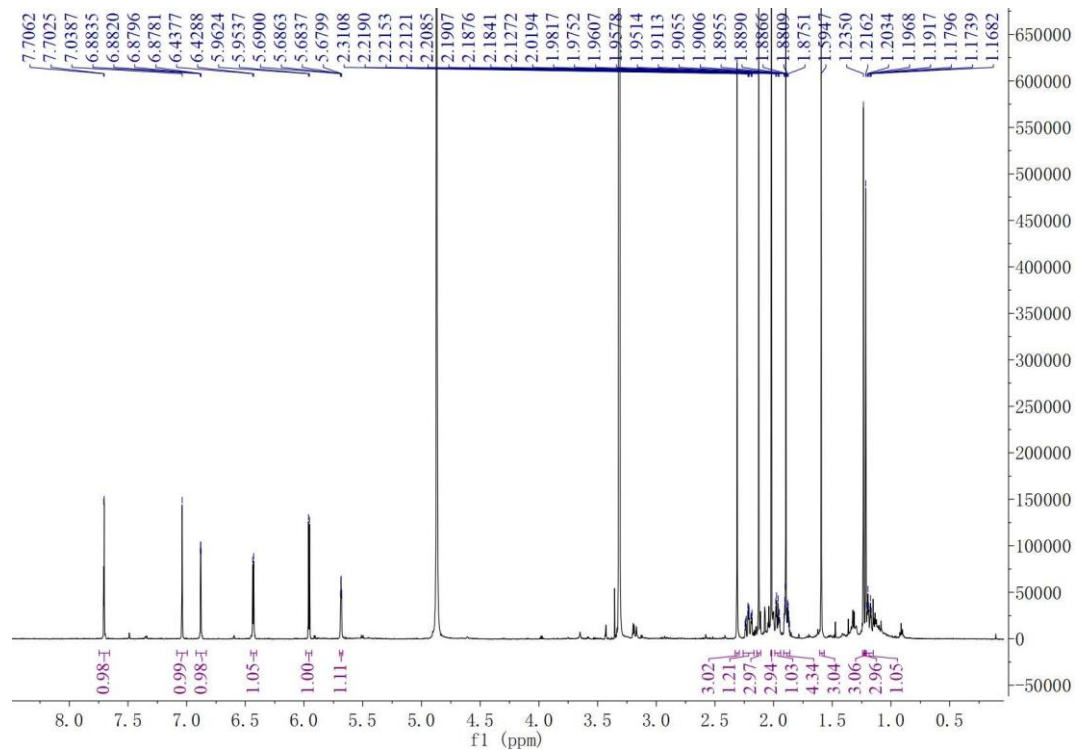

Figure S17.  $^1\text{H}$  NMR (600 MHz,  $\text{CD}_3\text{OD}$ ) spectrum of compound **2b**

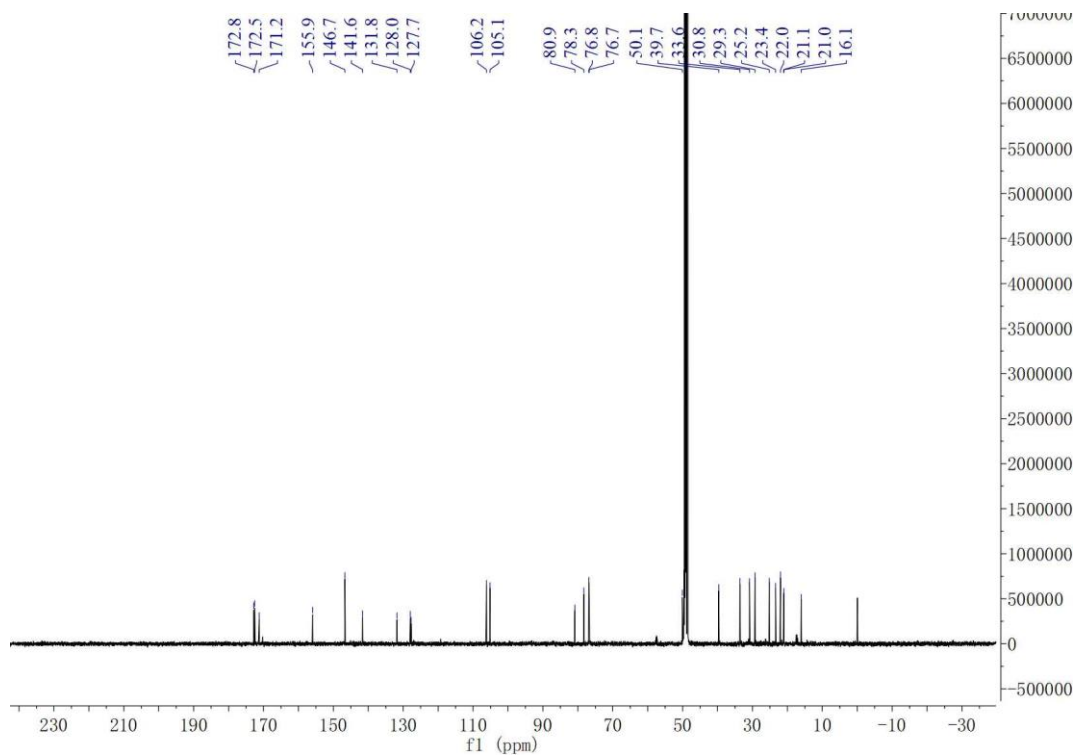

**Figure S18.**  $^{13}\text{C}$  NMR (150 MHz,  $\text{CD}_3\text{OD}$ ) spectrum of compound **2b**

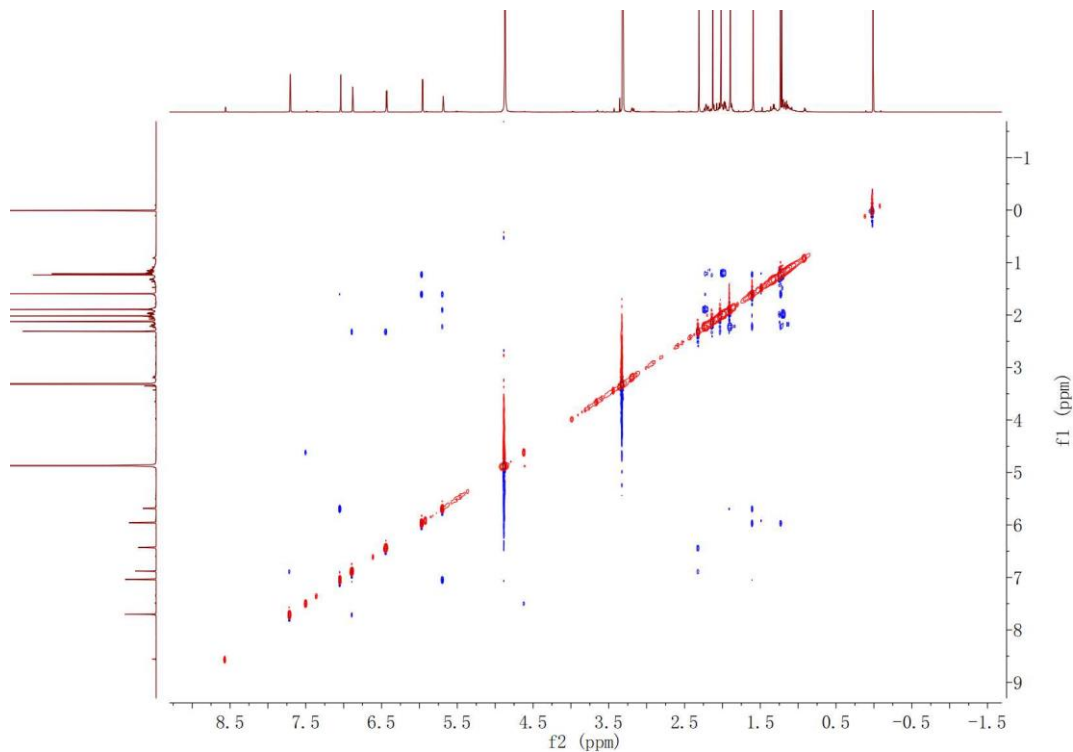

**Figure S19.** NOESY (600 MHz,  $\text{CD}_3\text{OD}$ ) spectrum of compound **2b**

**Acquisition Parameter**

|             |            |                      |          |                  |           |
|-------------|------------|----------------------|----------|------------------|-----------|
| Source Type | ESI        | Ion Polarity         | Positive | Set Nebulizer    | 1.8 Bar   |
| Focus       | Not active | Set Capillary        | 4500 V   | Set Dry Heater   | 220 °C    |
| Scan Begin  | 50 m/z     | Set End Plate Offset | -500 V   | Set Dry Gas      | 8.0 l/min |
| Scan End    | 1300 m/z   | Set Charging Voltage | 2000 V   | Set Divert Valve | Waste     |
|             |            | Set Corona           | 0 nA     | Set APCI Heater  | 0 °C      |

**C26H32O8, M+nNa, 495.1989**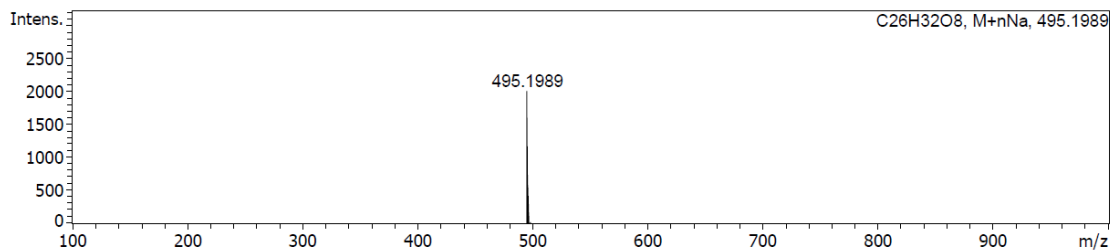**Figure S20. HRESIMS spectrum of compound 2b**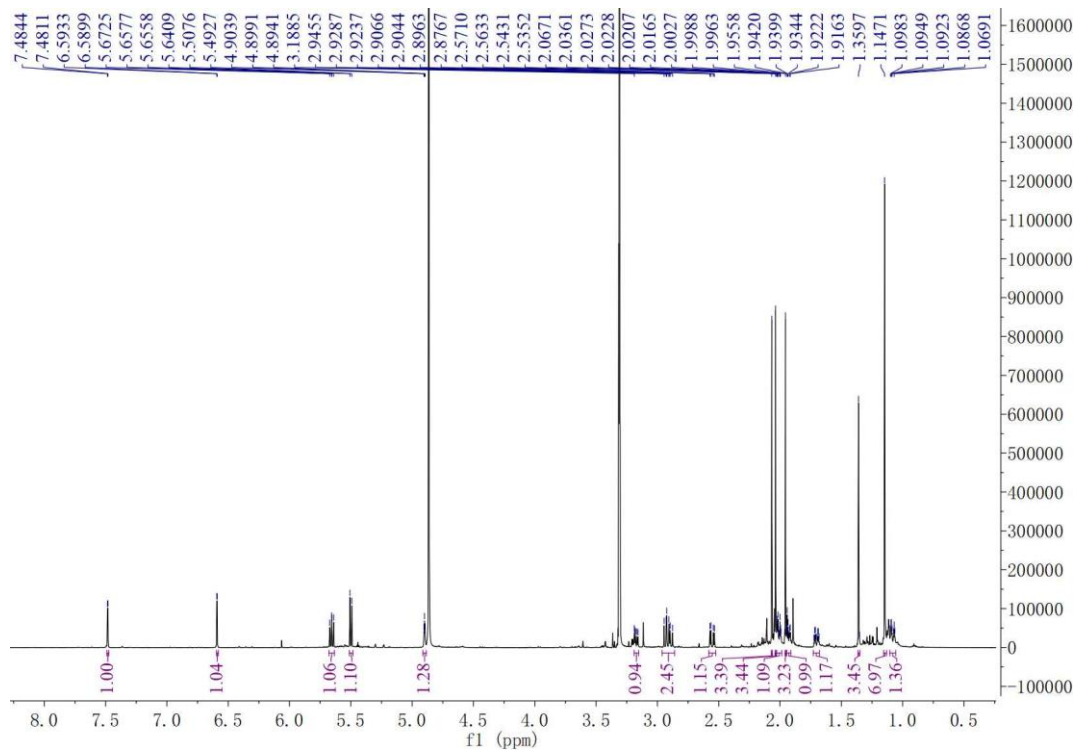**Figure S21. <sup>1</sup>H NMR (600 MHz, CD<sub>3</sub>OD) spectrum of compound 2c**

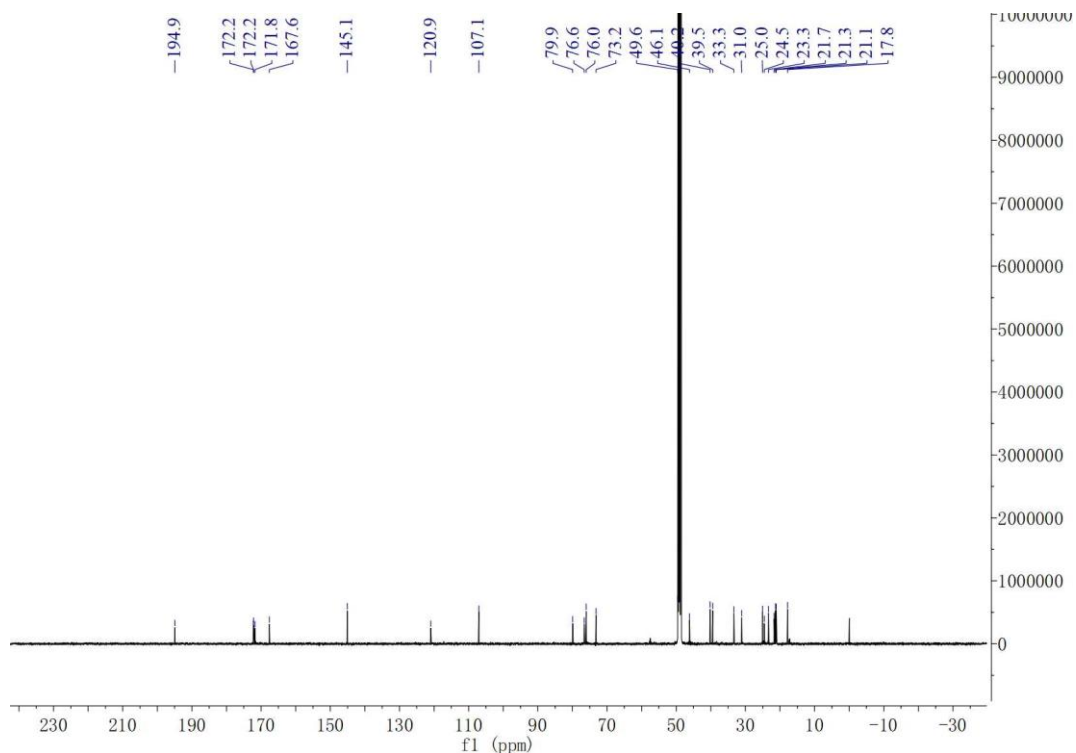

**Figure S22.**  $^{13}\text{C}$  NMR (150 MHz,  $\text{CD}_3\text{OD}$ ) spectrum of compound **2c**

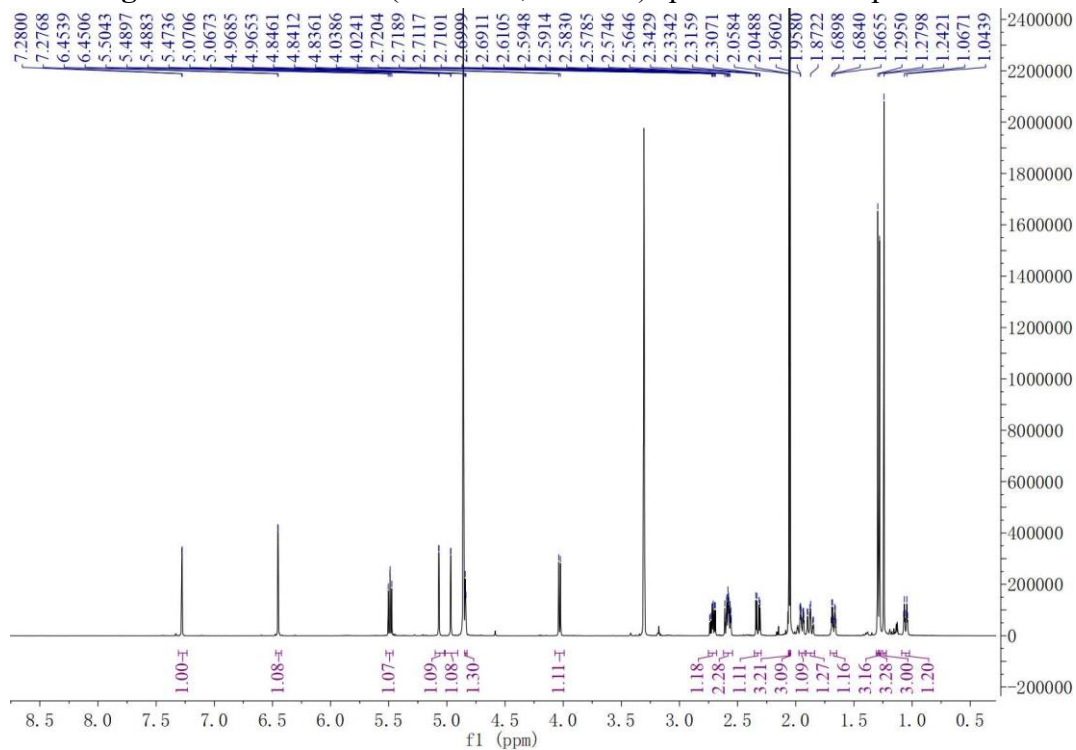

**Figure S23.**  $^1\text{H}$  NMR (600 MHz,  $\text{CD}_3\text{OD}$ ) spectrum of compound **3**



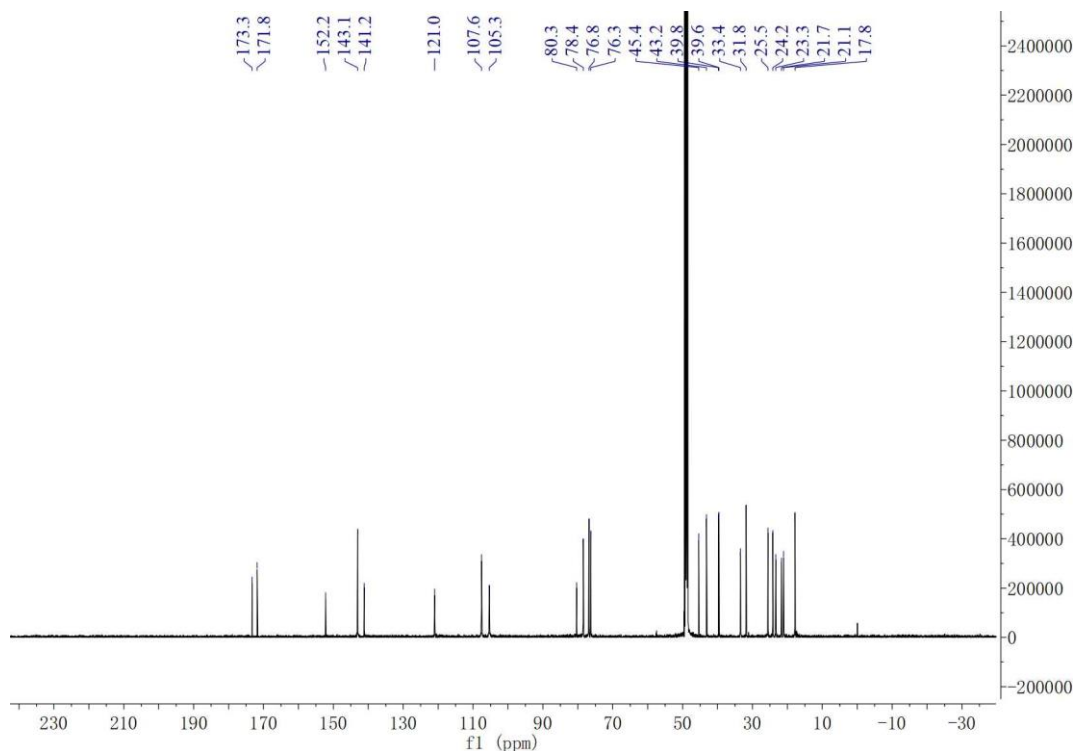

Figure S24.  $^{13}\text{C}$  NMR (150 MHz,  $\text{CD}_3\text{OD}$ ) spectrum of compound **3**

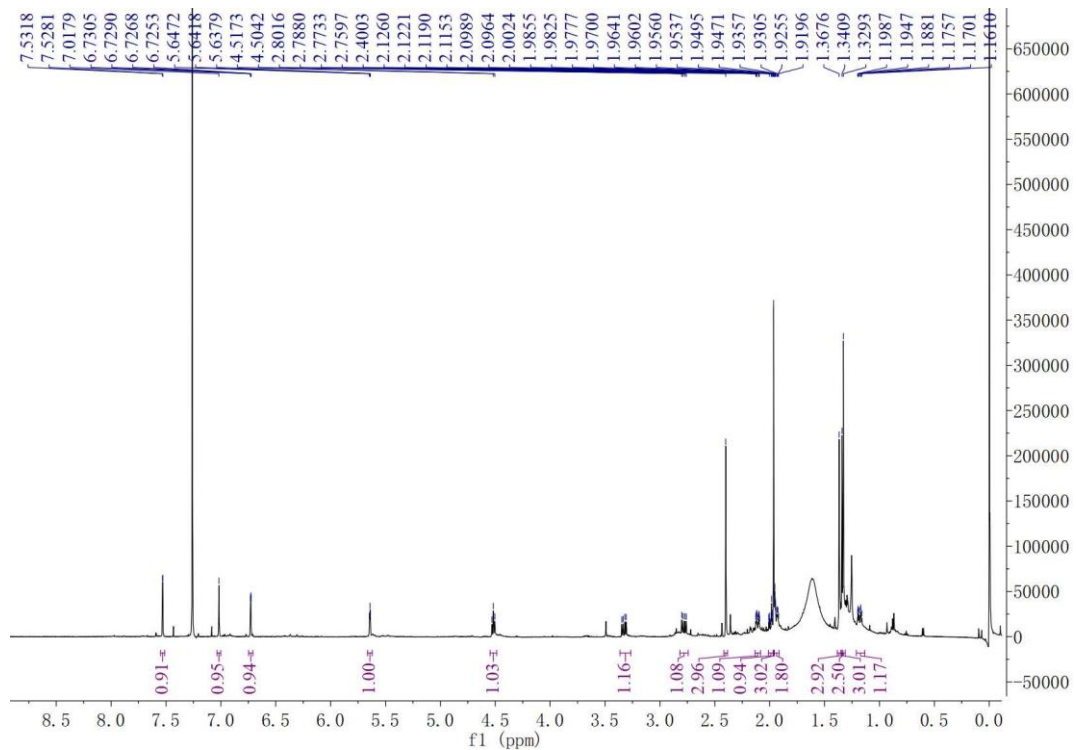

Figure S25.  $^1\text{H}$  NMR (600 MHz,  $\text{CDCl}_3$ ) spectrum of compound **3a**

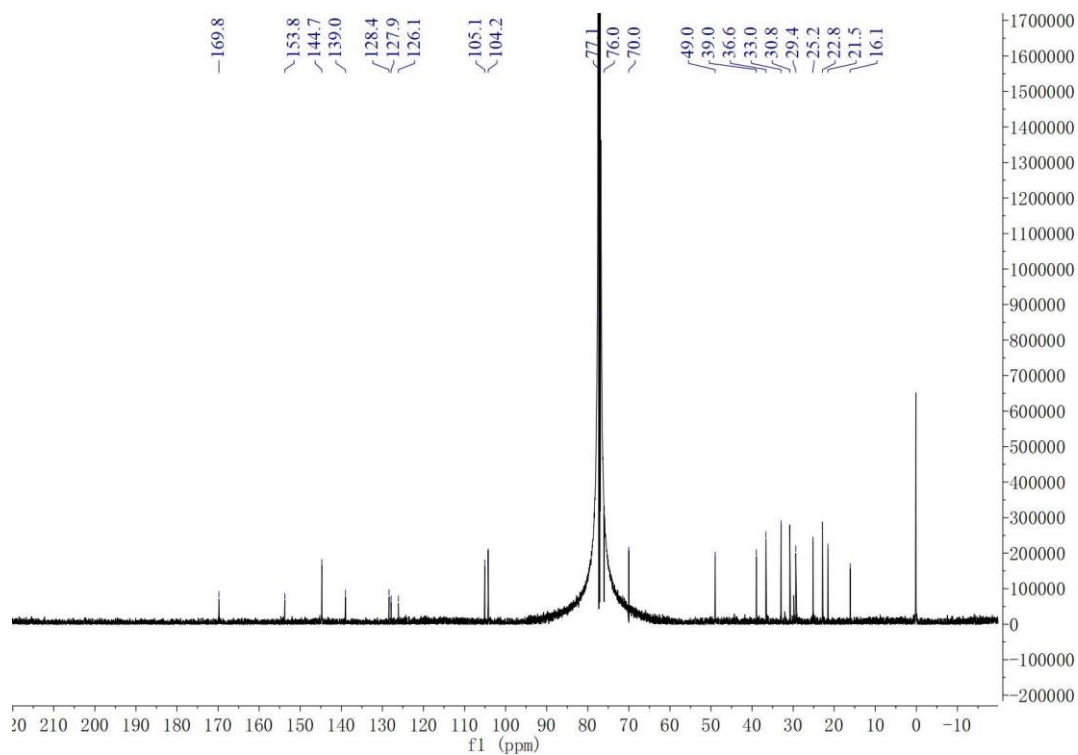

Figure S26.  $^{13}\text{C}$  NMR (150 MHz,  $\text{CDCl}_3$ ) spectrum of compound **3a**

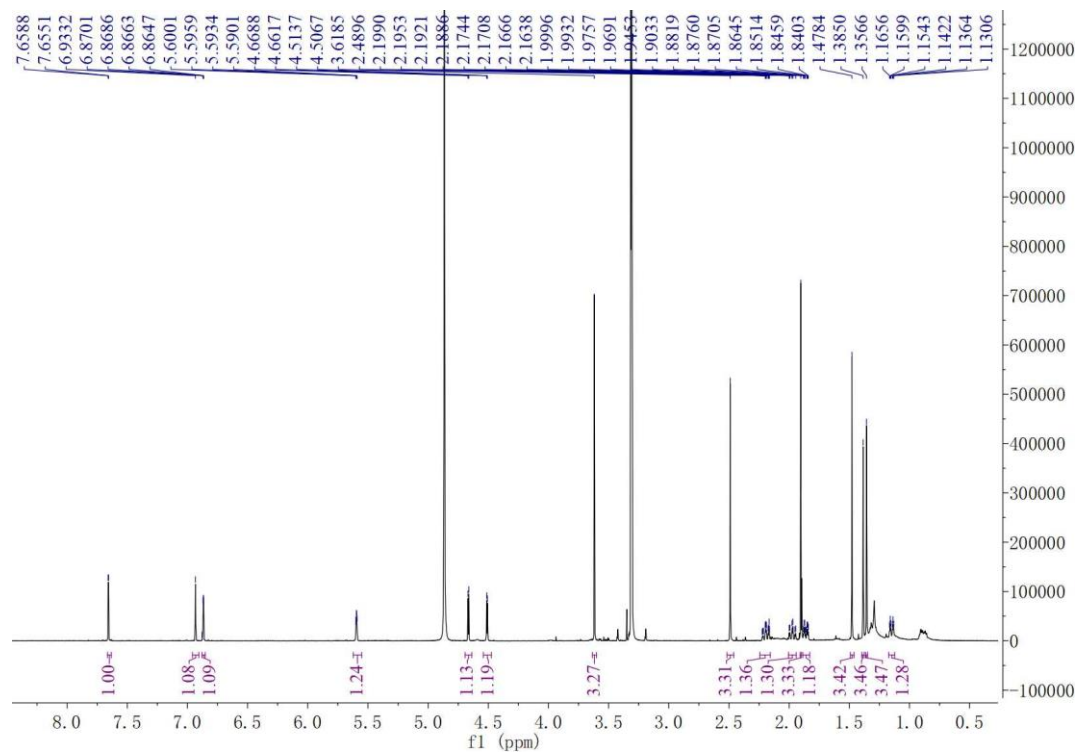

Figure S27.  $^1\text{H}$  NMR (600 MHz,  $\text{CD}_3\text{OD}$ ) spectrum of compound **3b**

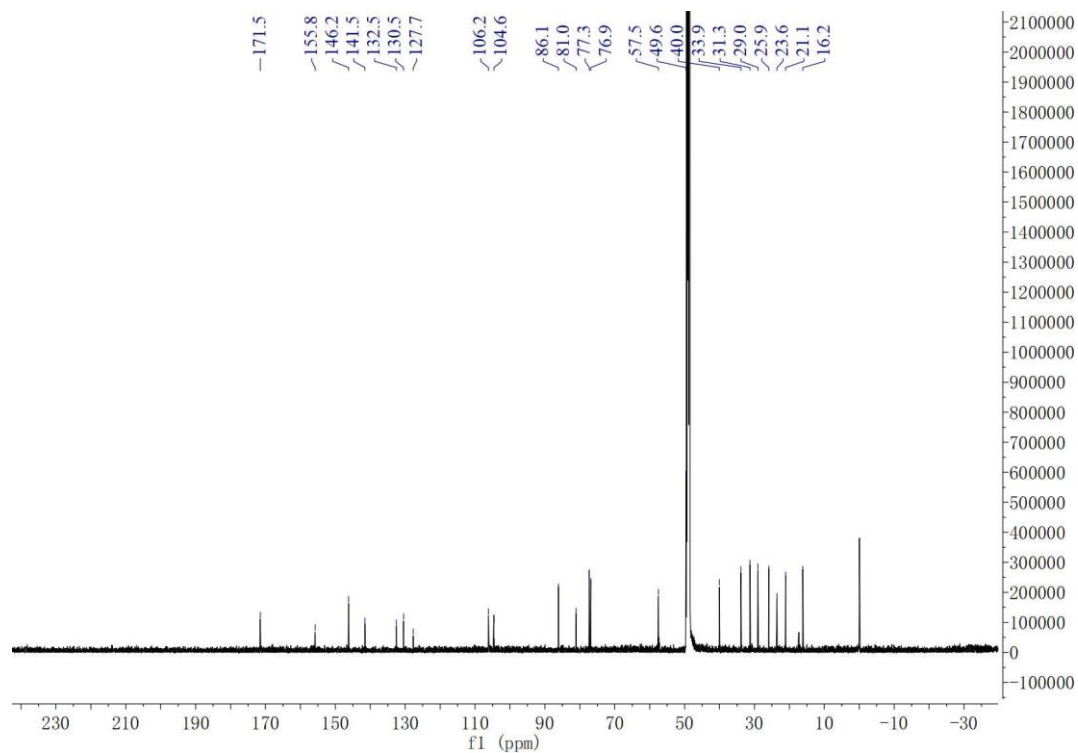

**Figure S28.**  $^{13}\text{C}$  NMR (150 MHz,  $\text{CD}_3\text{OD}$ ) spectrum of compound **3b**

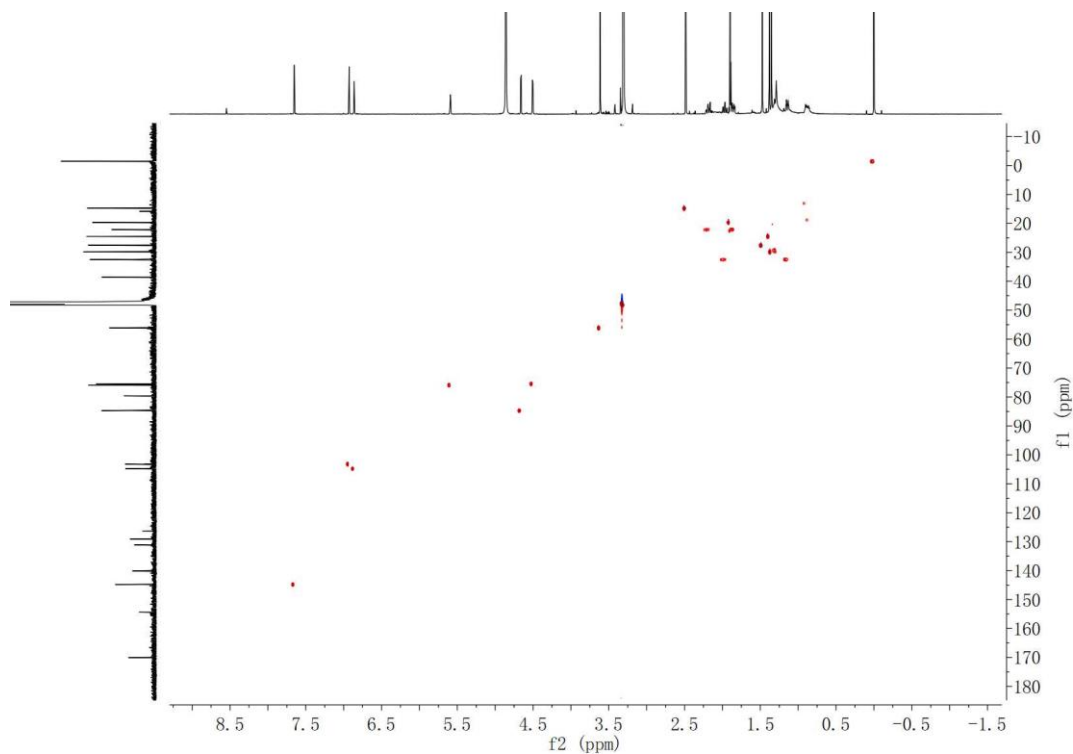

**Figure S29.** HSQC (600 MHz,  $\text{CD}_3\text{OD}$ ) spectrum of compound **3b**

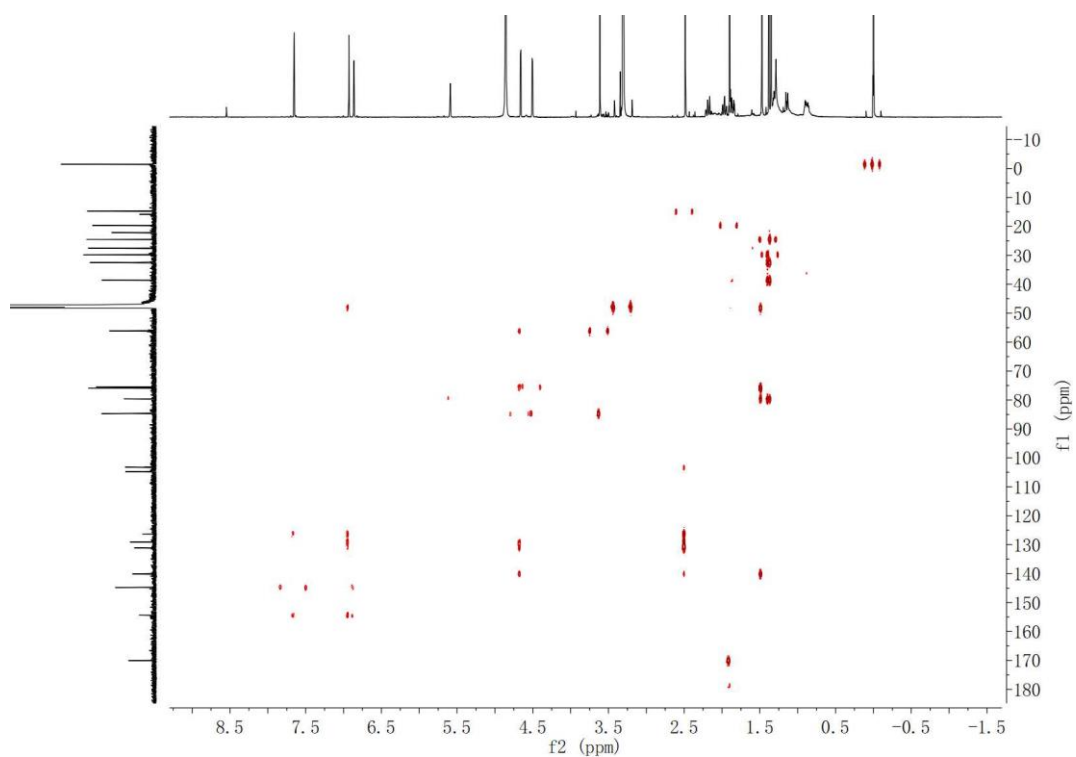

**Figure S30.** HMBC (600 MHz, CD<sub>3</sub>OD) spectrum of compound **3b**

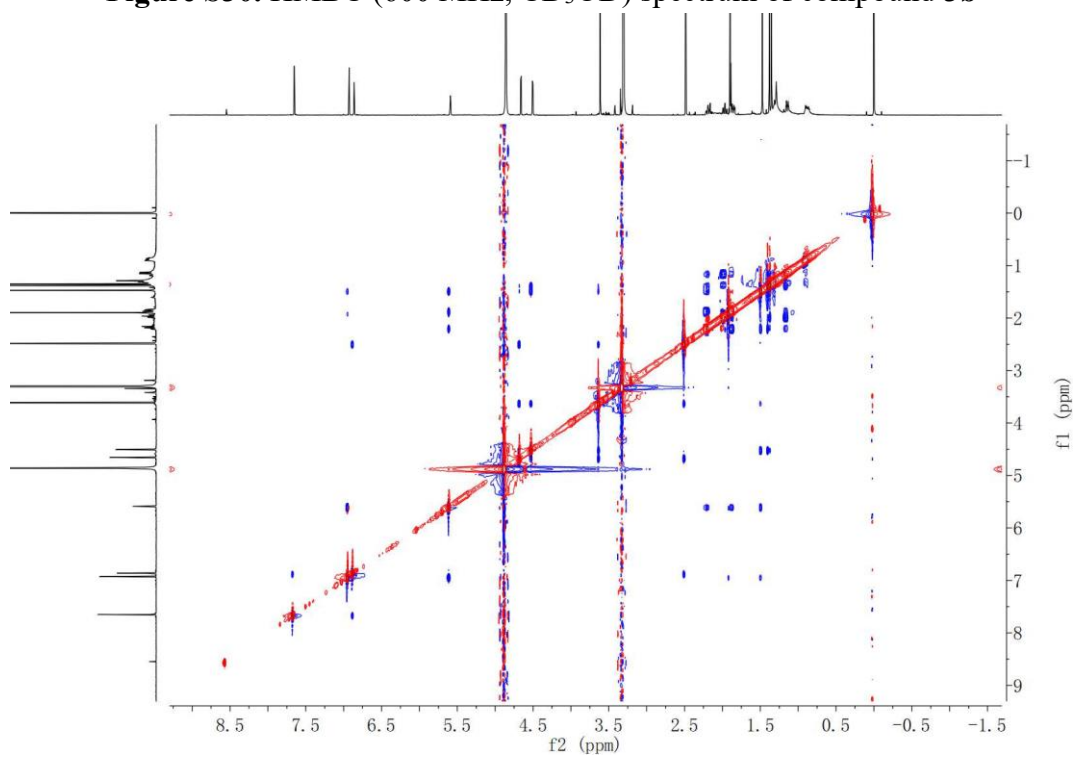

**Figure S31.** NOESY (600 MHz, CD<sub>3</sub>OD) spectrum of compound **3b**

**Acquisition Parameter**

|             |            |                      |          |                  |           |
|-------------|------------|----------------------|----------|------------------|-----------|
| Source Type | ESI        | Ion Polarity         | Positive | Set Nebulizer    | 1.8 Bar   |
| Focus       | Not active | Set Capillary        | 4500 V   | Set Dry Heater   | 220 °C    |
| Scan Begin  | 50 m/z     | Set End Plate Offset | -500 V   | Set Dry Gas      | 8.0 l/min |
| Scan End    | 1300 m/z   | Set Charging Voltage | 2000 V   | Set Divert Valve | Waste     |
|             |            | Set Corona           | 0 nA     | Set APCI Heater  | 0 °C      |

C23H30O6, M+nNa, 425.1935

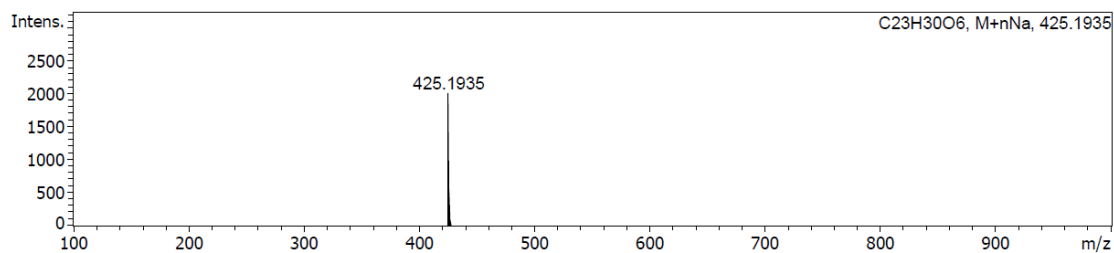**Figure S32. HRESIMS spectrum of compound 3b**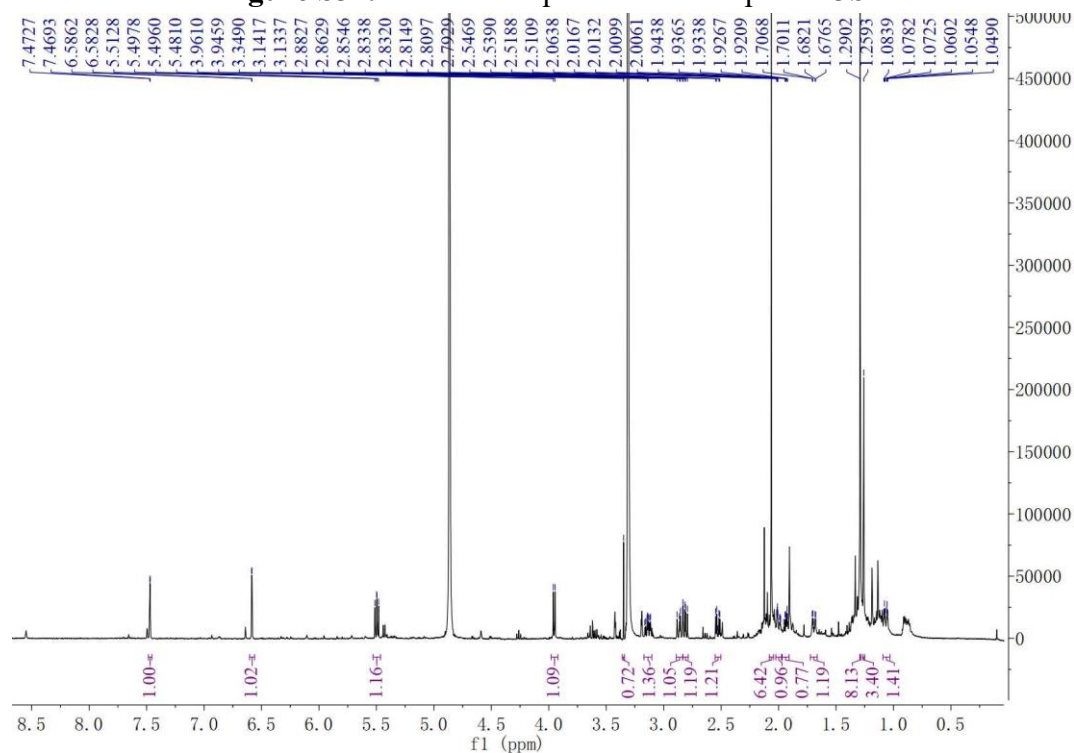**Figure S33. <sup>1</sup>H NMR (600 MHz, CD<sub>3</sub>OD) spectrum of compound 3c**

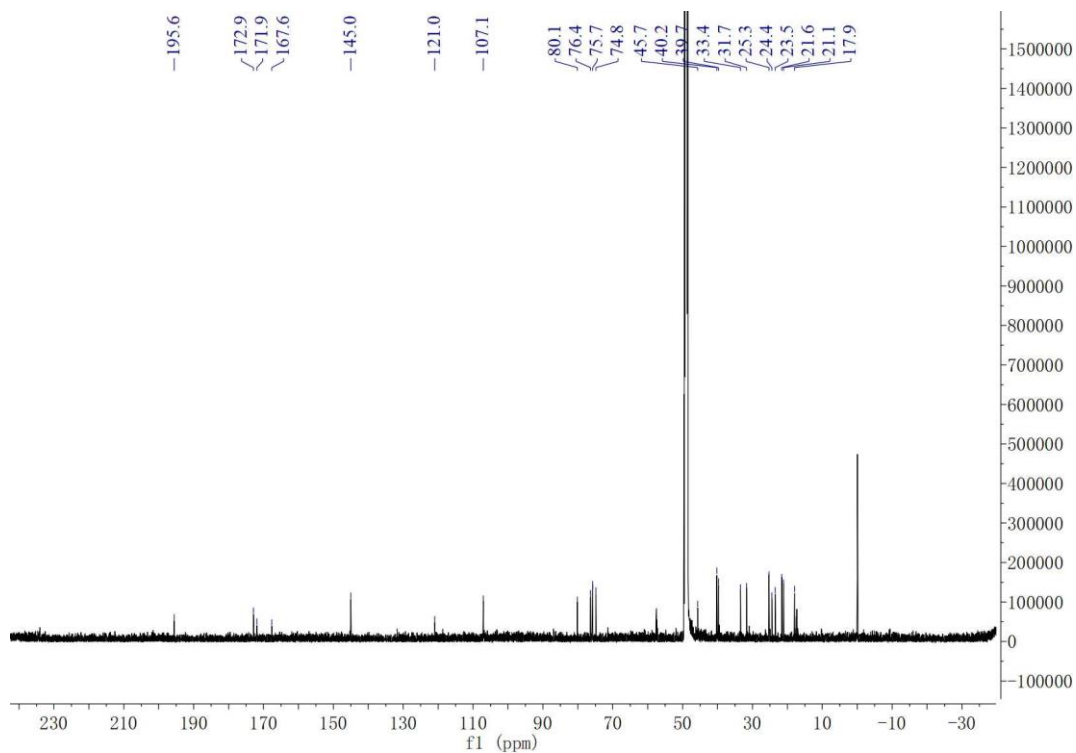

**Figure S34.**  $^{13}\text{C}$  NMR (150 MHz,  $\text{CD}_3\text{OD}$ ) spectrum of compound **3c**

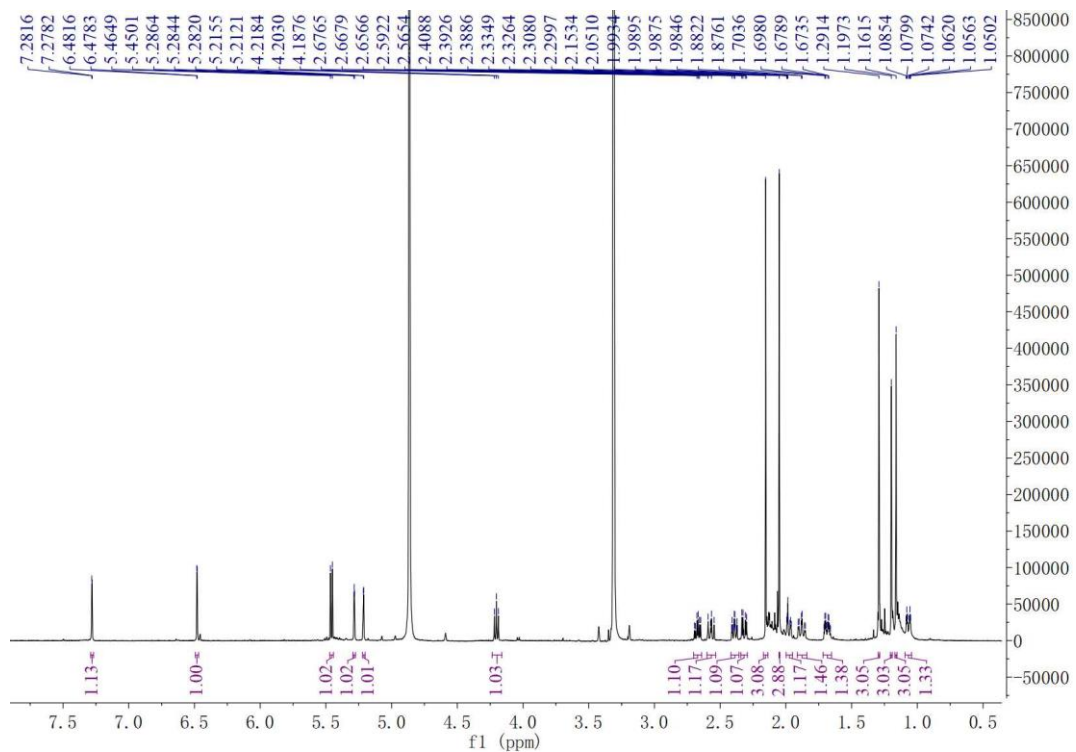

**Figure S35.**  $^1\text{H}$  NMR (600 MHz,  $\text{CD}_3\text{OD}$ ) spectrum of compound **4**

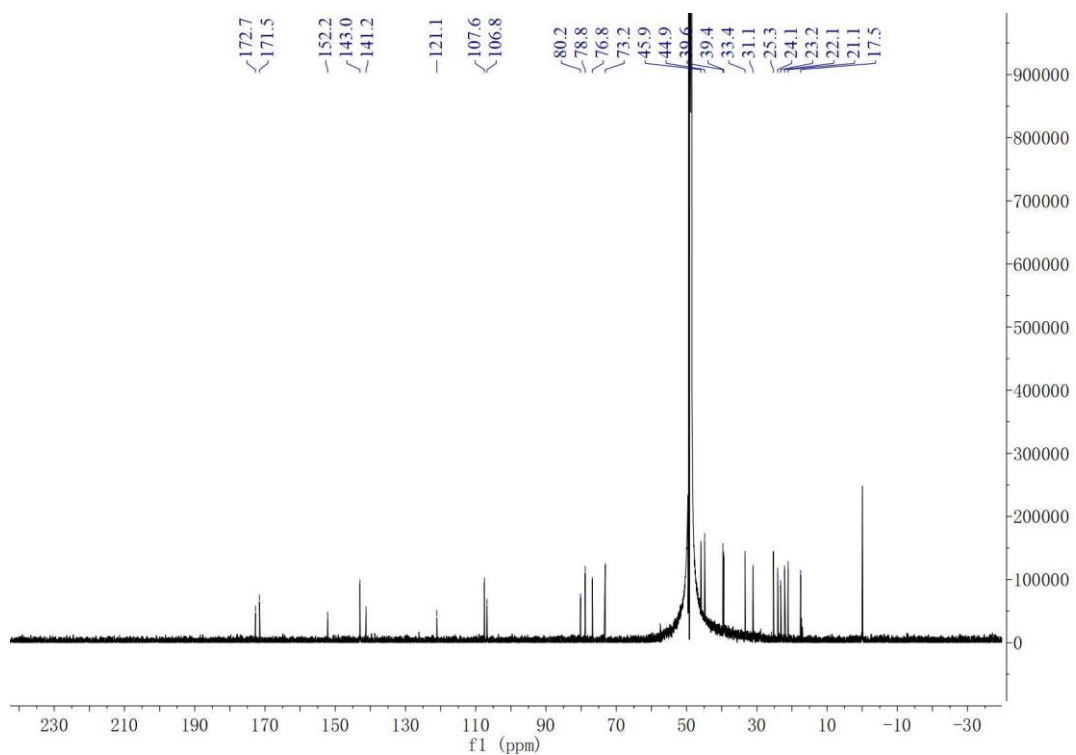

Figure S36.  $^{13}\text{C}$  NMR (150 MHz,  $\text{CD}_3\text{OD}$ ) spectrum of compound 4

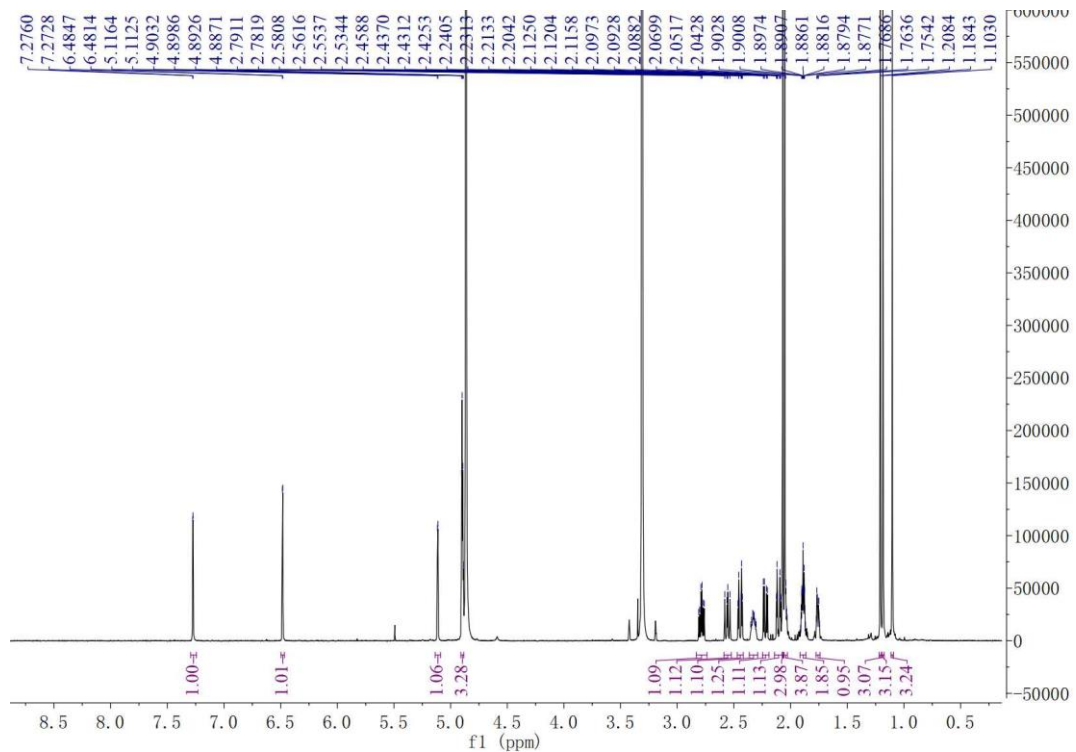

Figure S37.  $^1\text{H}$  NMR (600 MHz,  $\text{CD}_3\text{OD}$ ) spectrum of compound 5

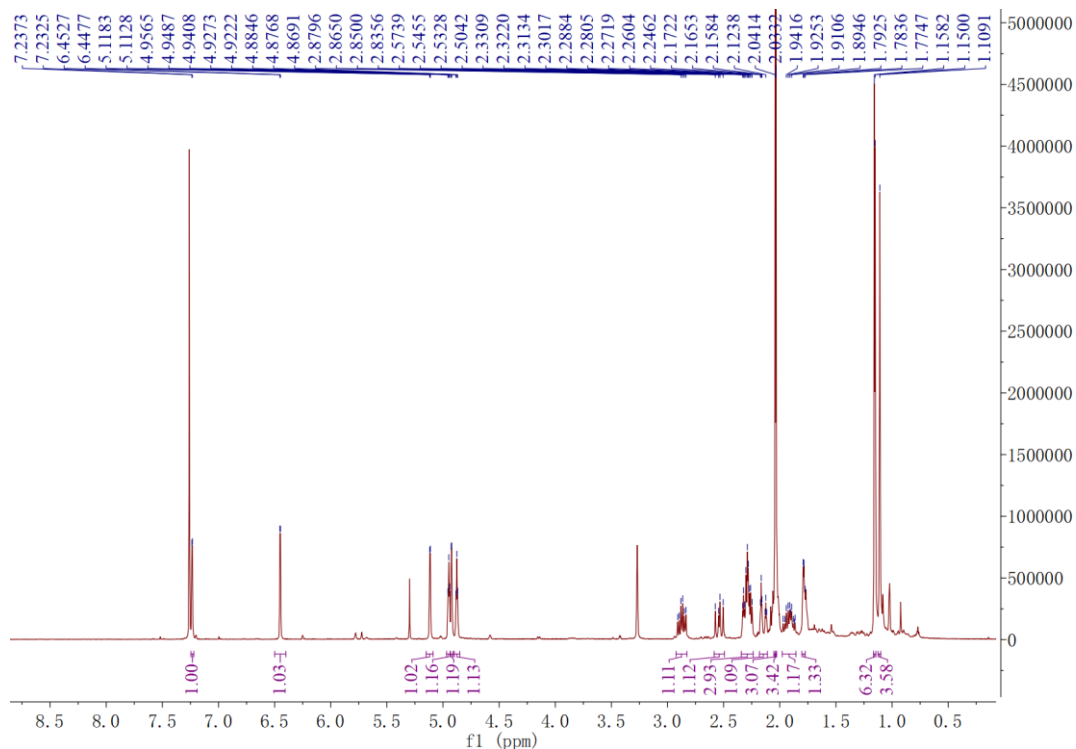

**Figure S38.**  $^1\text{H}$  NMR (400 MHz,  $\text{CDCl}_3$ ) spectrum of compound **5**

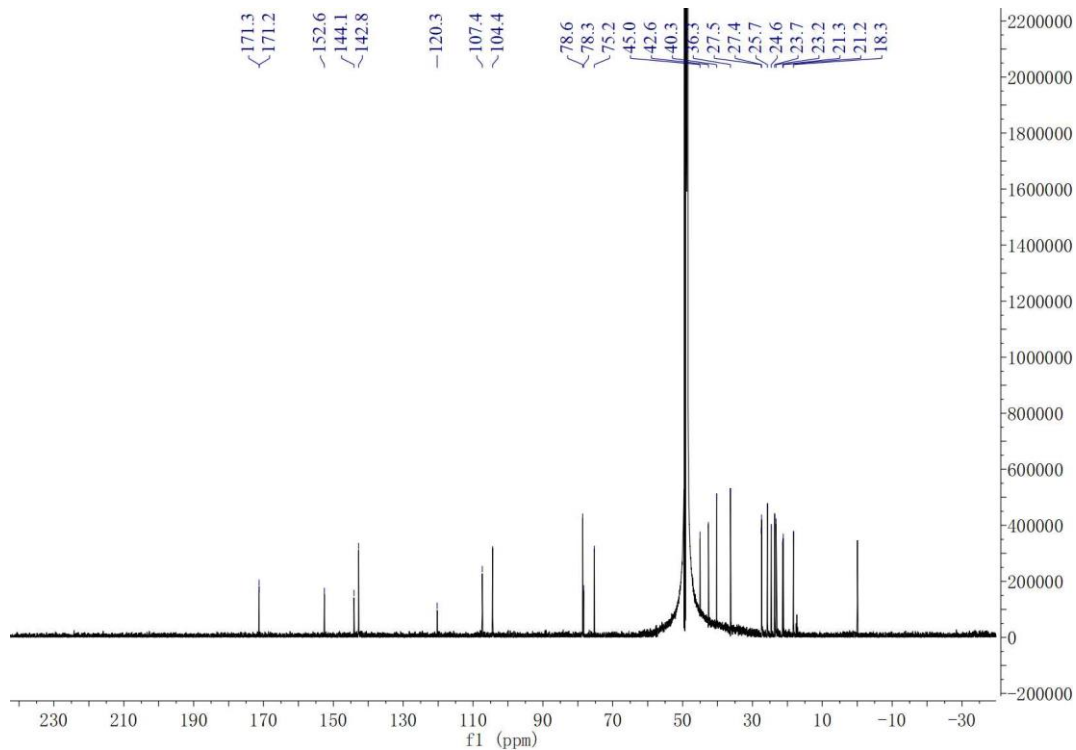

**Figure S39.**  $^{13}\text{C}$  NMR (150 MHz,  $\text{CD}_3\text{OD}$ ) spectrum of compound **5**



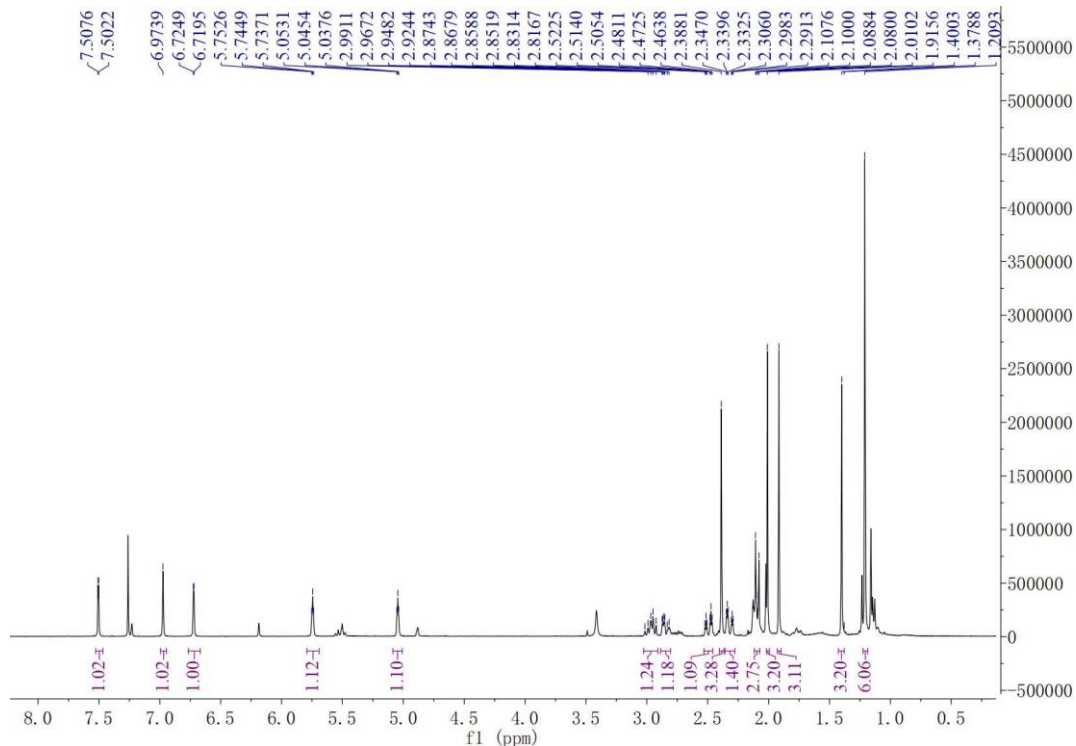

Figure S40.  $^1\text{H}$  NMR (400 MHz,  $\text{CDCl}_3$ ) spectrum of compound **5a**

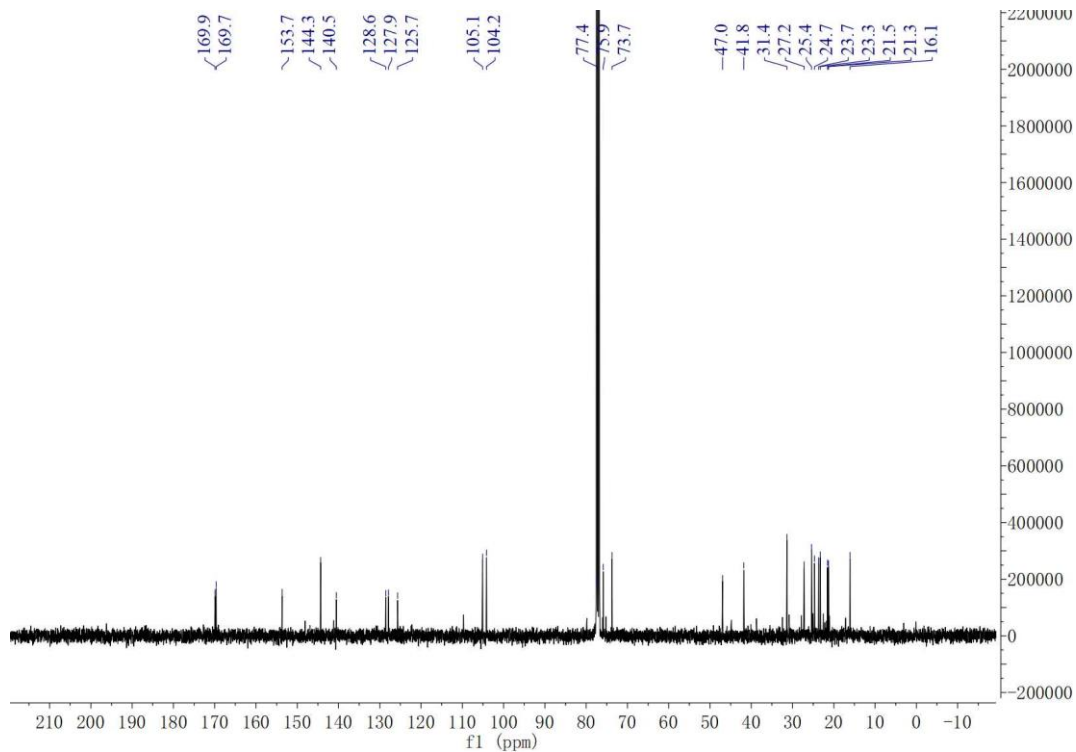

Figure S41.  $^{13}\text{C}$  NMR (100 MHz,  $\text{CDCl}_3$ ) spectrum of compound **5a**

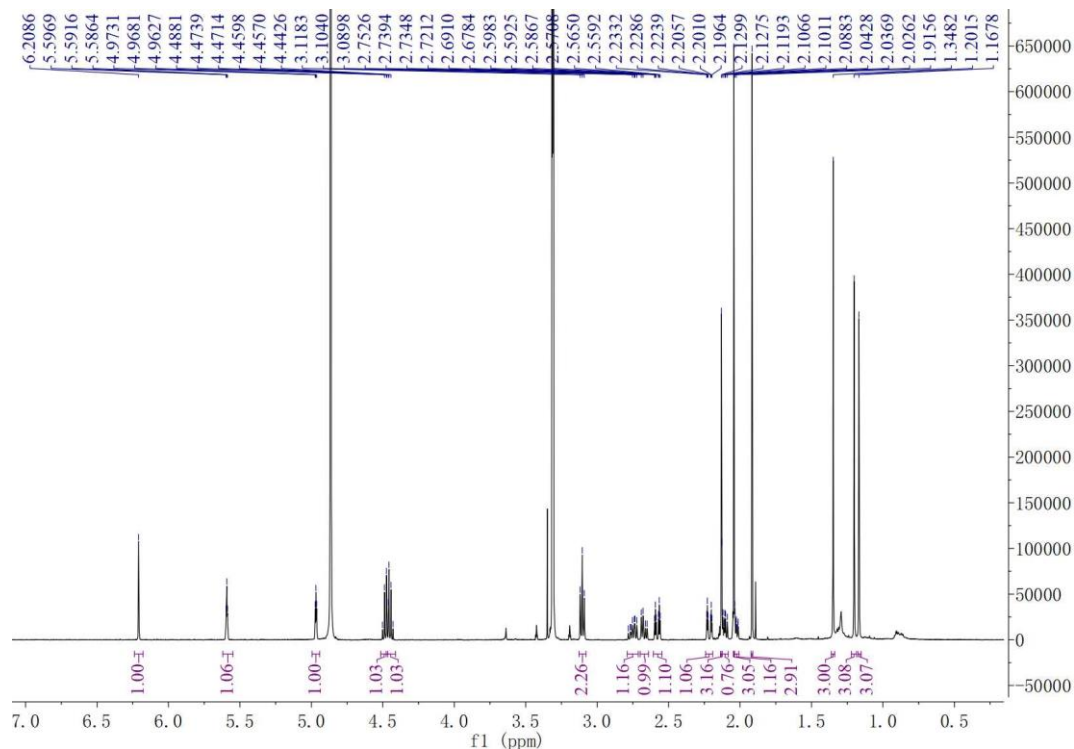

**Figure S42.**  $^1\text{H}$  NMR (600 MHz,  $\text{CD}_3\text{OD}$ ) spectrum of compound **5b**

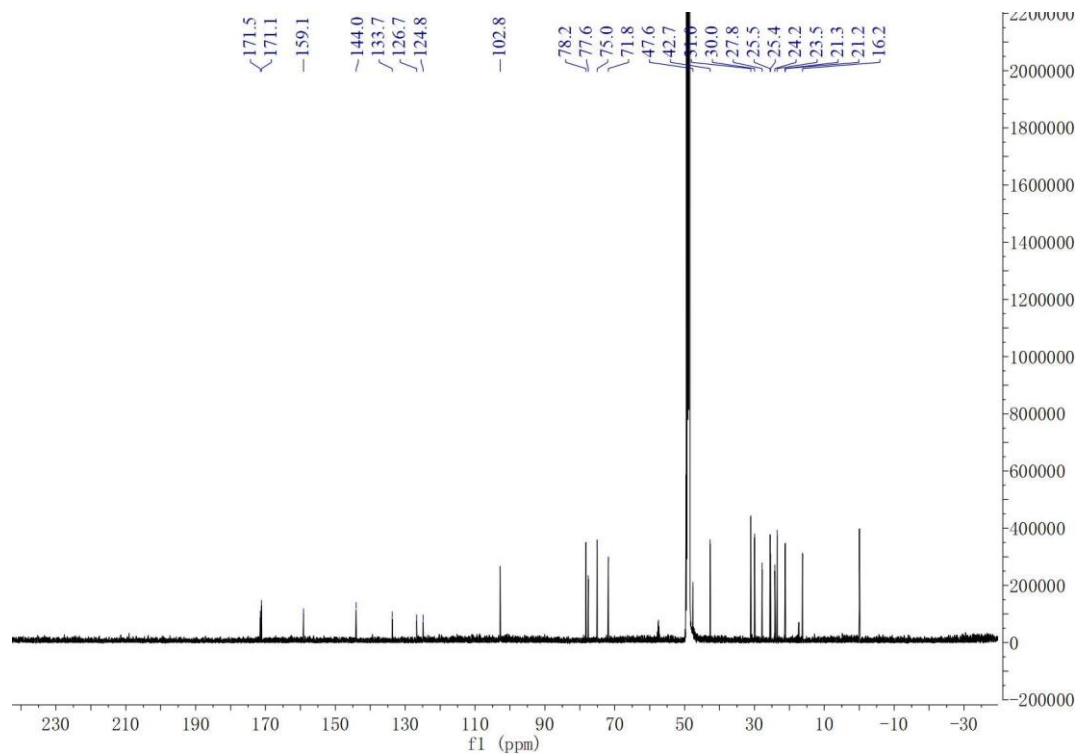

**Figure S43.**  $^{13}\text{C}$  NMR (150 MHz,  $\text{CD}_3\text{OD}$ ) spectrum of compound **5b**

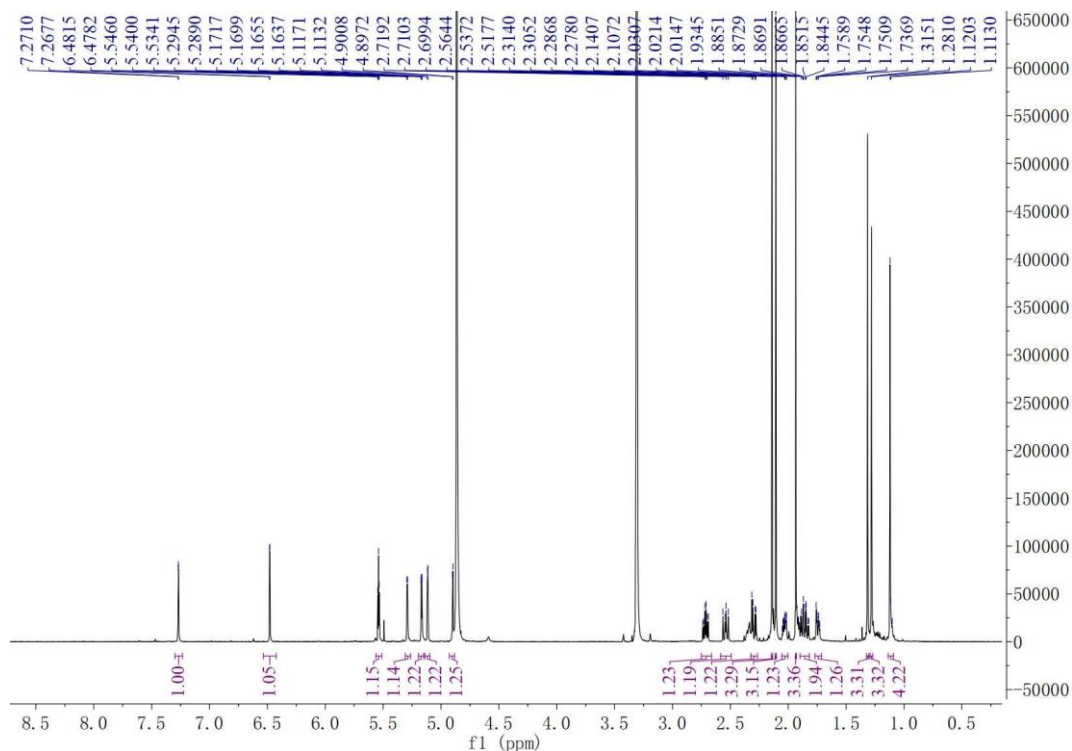

**Figure S44.**  $^1\text{H}$  NMR (600 MHz,  $\text{CD}_3\text{OD}$ ) spectrum of compound **6**

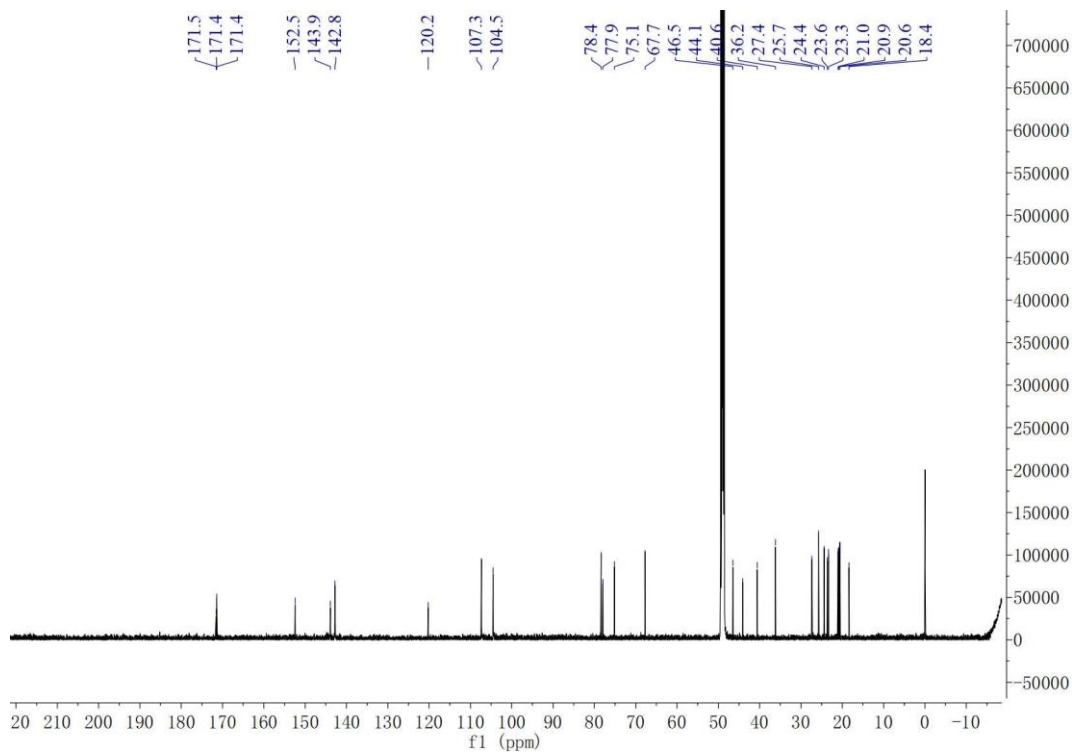

**Figure S45.**  $^{13}\text{C}$  NMR (150 MHz,  $\text{CD}_3\text{OD}$ ) spectrum of compound **6**

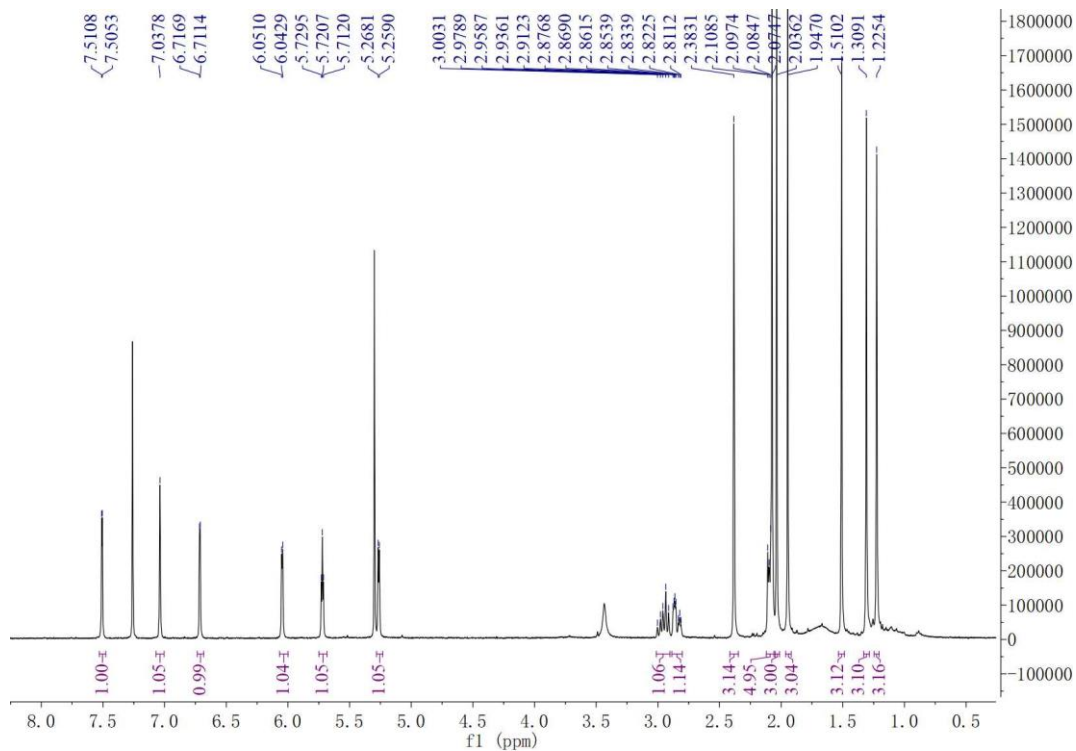

Figure S46.  $^1\text{H}$  NMR (400 MHz,  $\text{CDCl}_3$ ) spectrum of compound **6a**

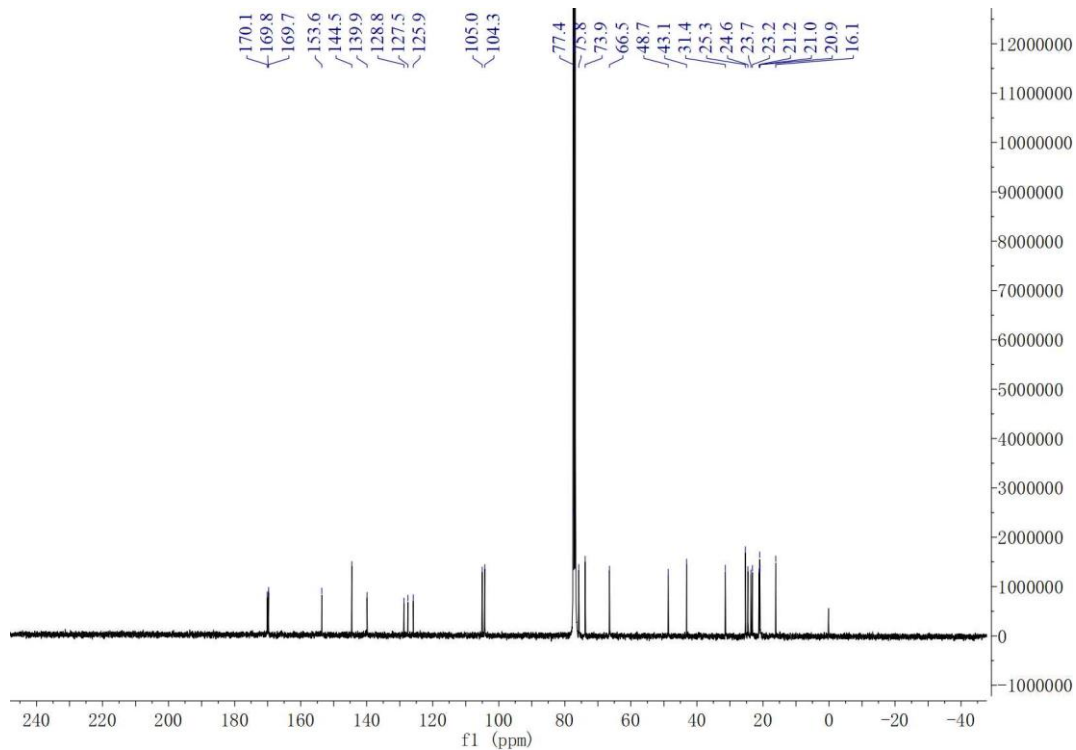

Figure S47.  $^{13}\text{C}$  NMR (100 MHz,  $\text{CDCl}_3$ ) spectrum of compound **6a**

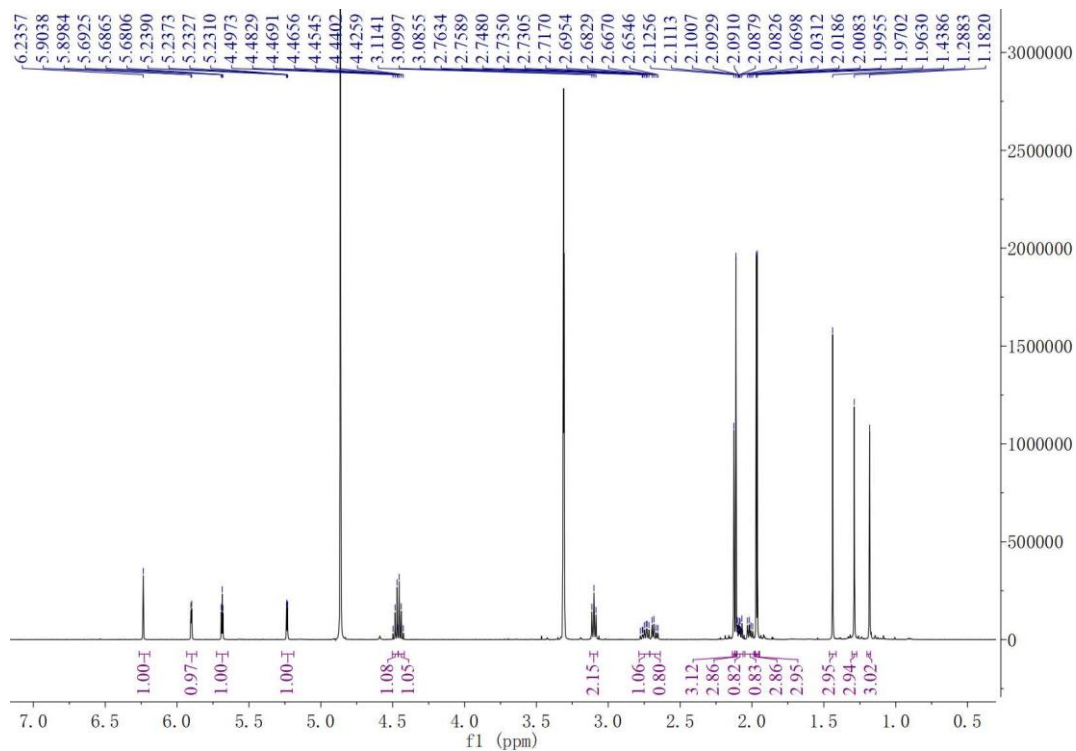

**Figure S48.**  $^1\text{H}$  NMR (600 MHz,  $\text{CD}_3\text{OD}$ ) spectrum of compound **6b**

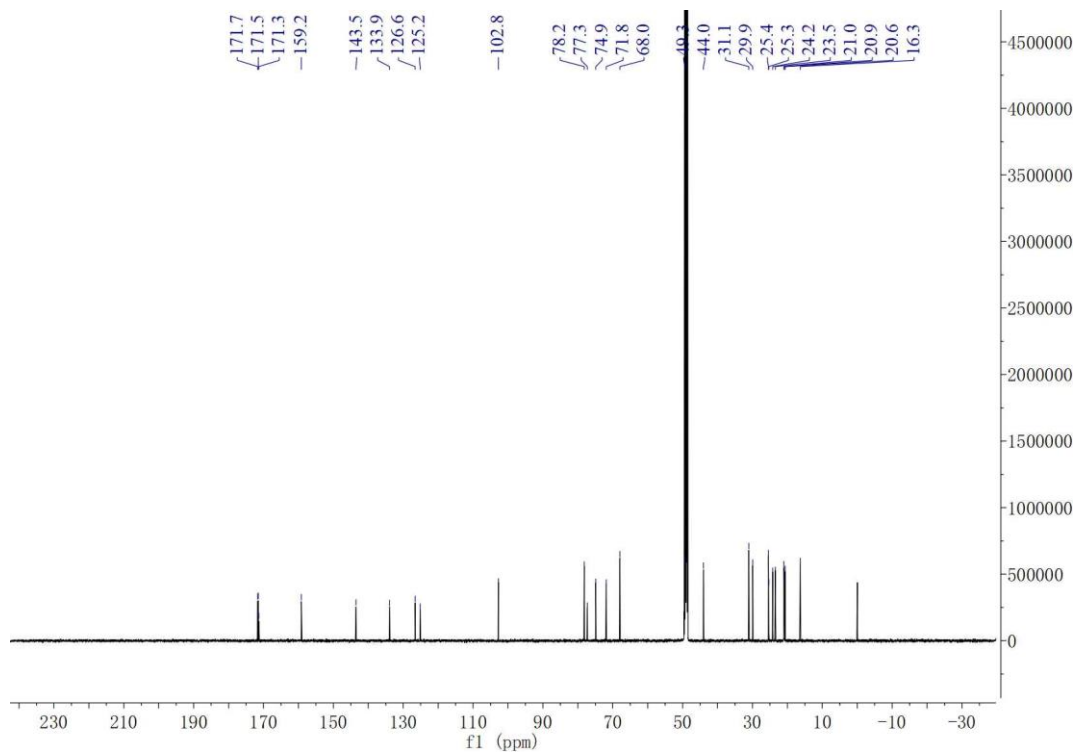

**Figure S49.**  $^{13}\text{C}$  NMR (150 MHz,  $\text{CD}_3\text{OD}$ ) spectrum of compound **6b**

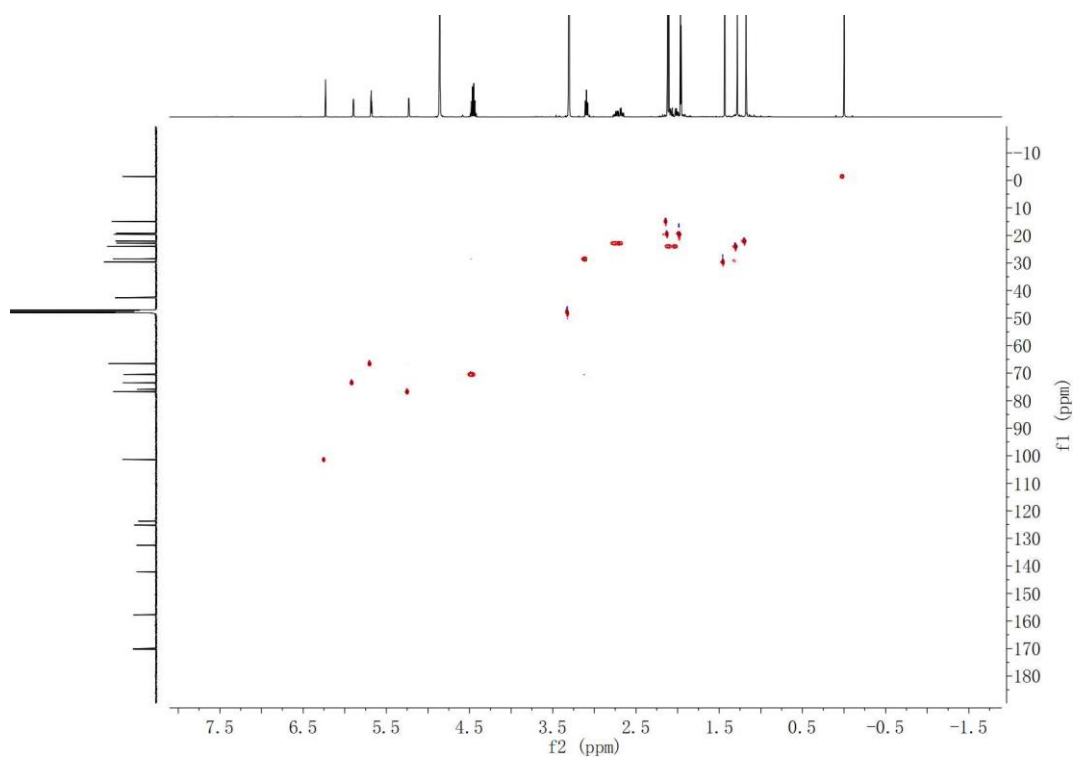

**Figure S50.** HSQC (600 MHz, CD<sub>3</sub>OD) spectrum of compound **6b**

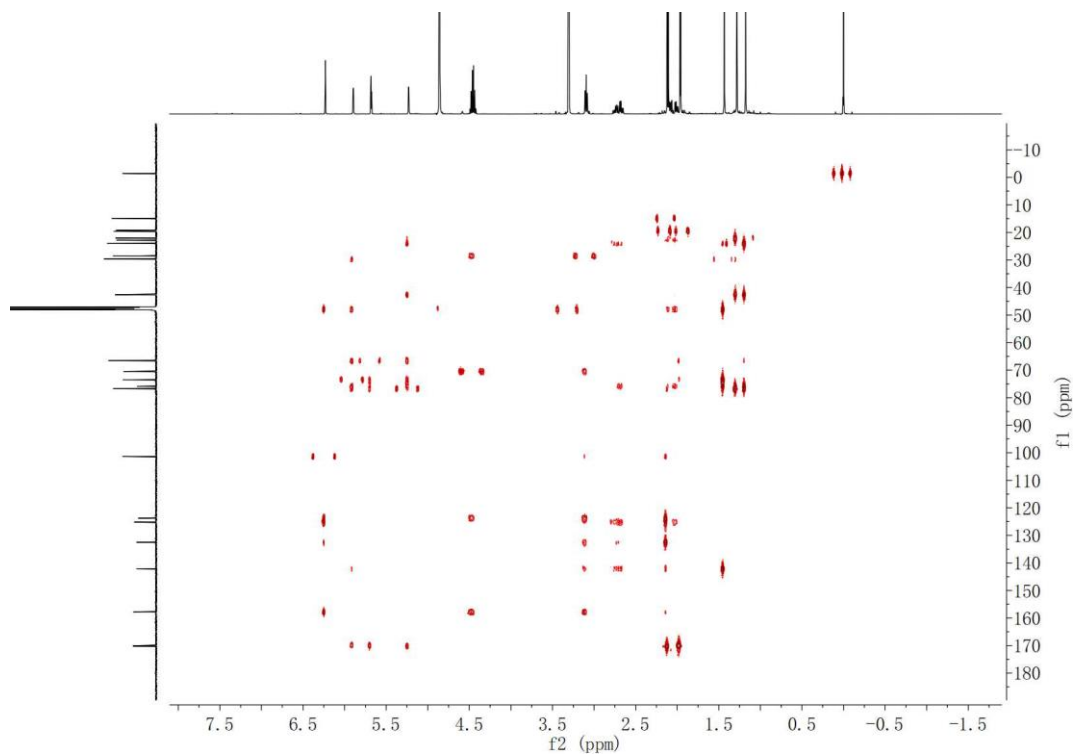

**Figure S51.** HMBC (600 MHz, CD<sub>3</sub>OD) spectrum of compound **6b**

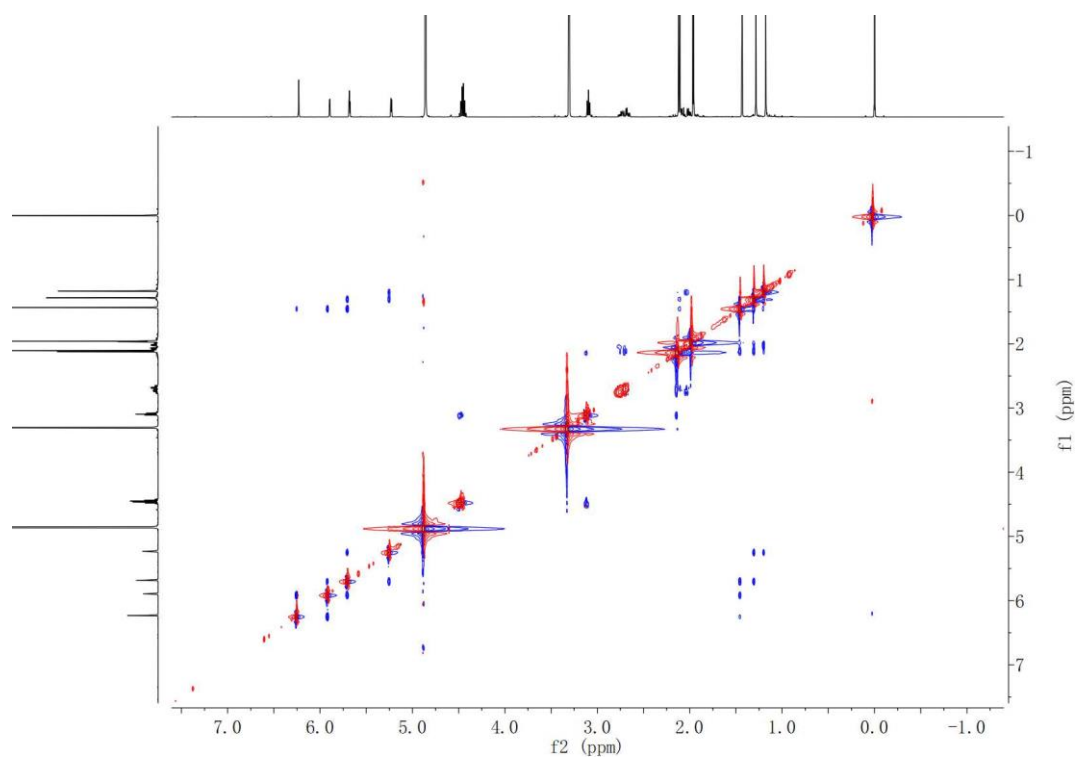

**Figure S52.** NOESY (600 MHz, CD<sub>3</sub>OD) spectrum of compound **6b**

**Acquisition Parameter**

|             |            |                      |          |                  |           |
|-------------|------------|----------------------|----------|------------------|-----------|
| Source Type | ESI        | Ion Polarity         | Positive | Set Nebulizer    | 1.8 Bar   |
| Focus       | Not active | Set Capillary        | 4500 V   | Set Dry Heater   | 220 °C    |
| Scan Begin  | 50 m/z     | Set End Plate Offset | -500 V   | Set Dry Gas      | 8.0 l/min |
| Scan End    | 1300 m/z   | Set Charging Voltage | 2000 V   | Set Divert Valve | Waste     |
|             |            | Set Corona           | 0 nA     | Set APCI Heater  | 0 °C      |

**C26H34O8, M+nNa, 497.2146**

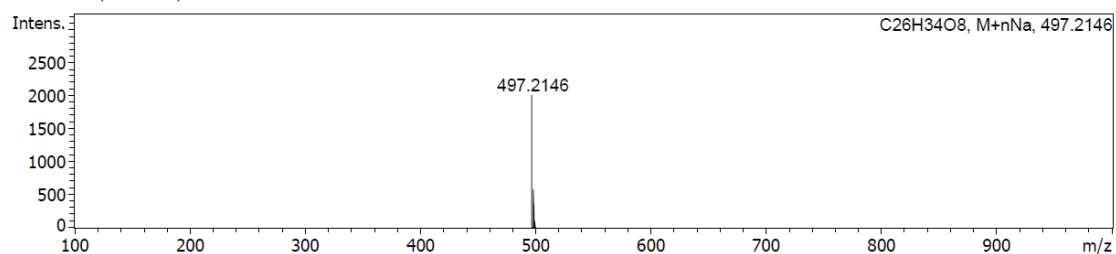

**Figure S53.** HRESIMS spectrum of compound **6b**

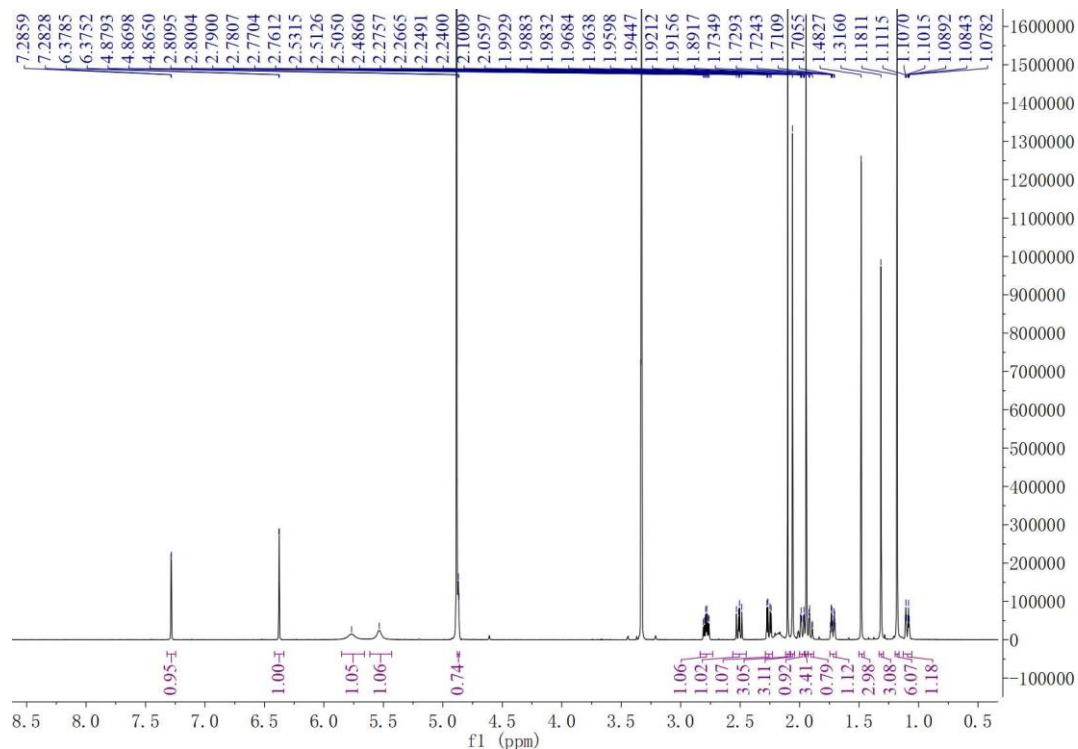

Figure S54.  $^1\text{H}$  NMR (600 MHz,  $\text{CD}_3\text{OD}$ ) spectrum of compound 7

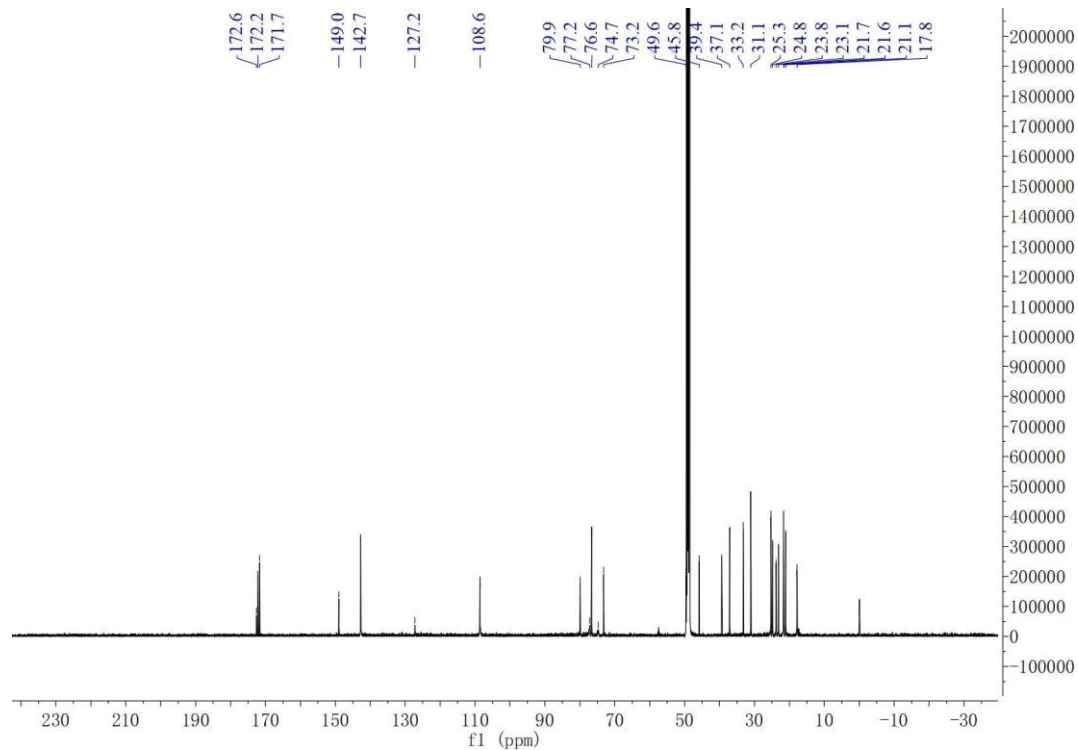

Figure S55.  $^{13}\text{C}$  NMR (150 MHz,  $\text{CD}_3\text{OD}$ ) spectrum of compound 7



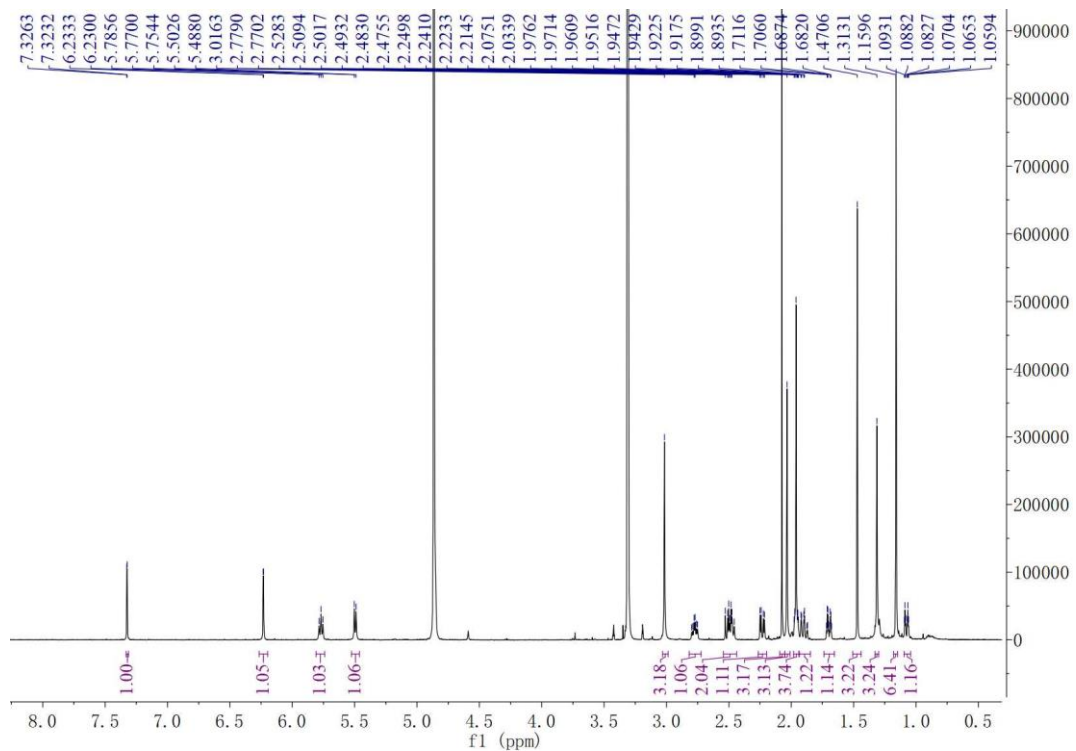

Figure S56.  $^1\text{H}$  NMR (600 MHz,  $\text{CD}_3\text{OD}$ ) spectrum of compound **8**

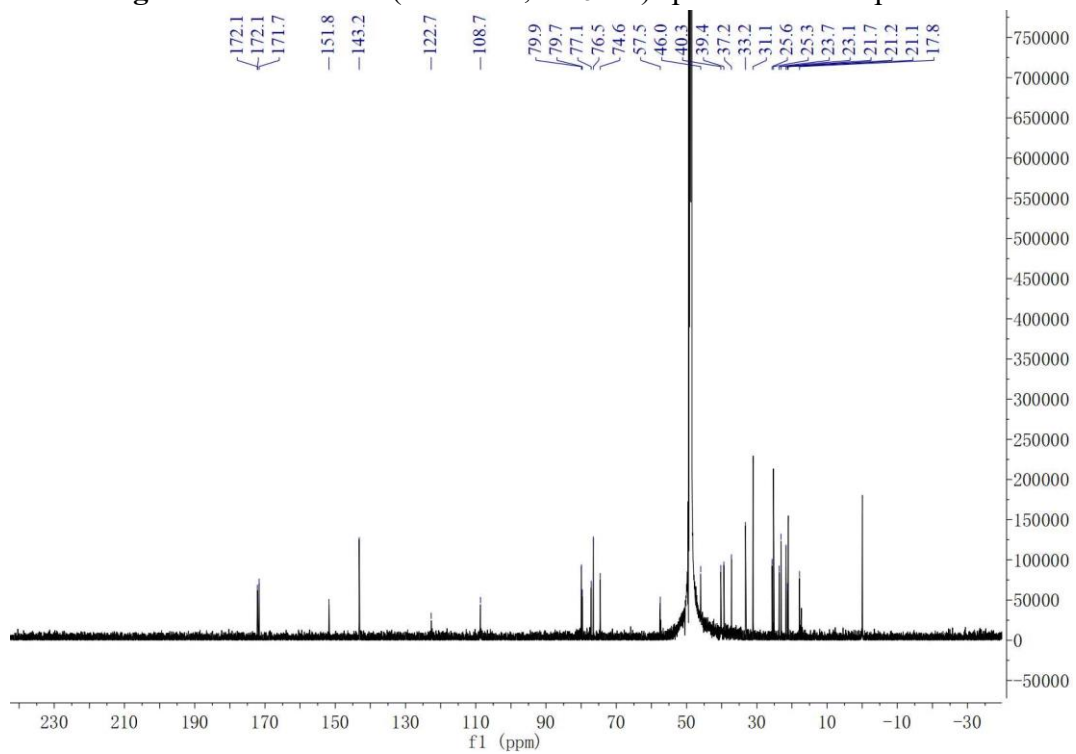

Figure S57.  $^{13}\text{C}$  NMR (150 MHz,  $\text{CD}_3\text{OD}$ ) spectrum of compound **8**

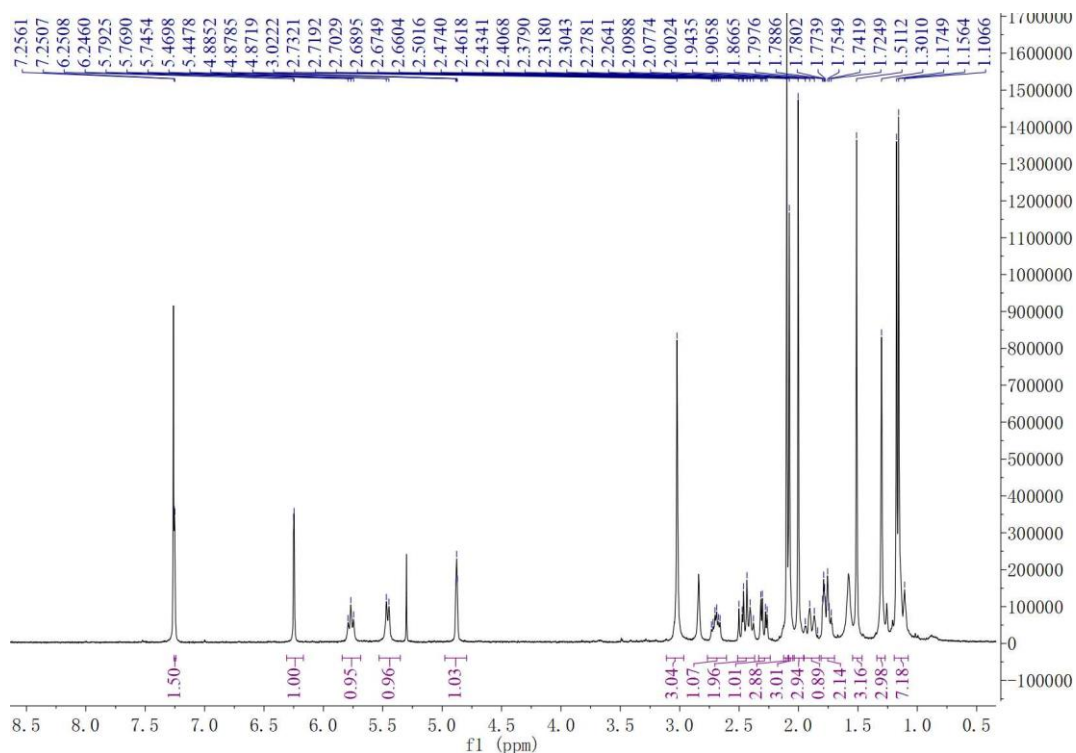

**Figure S58.**  $^1\text{H}$  NMR (400 MHz,  $\text{CDCl}_3$ ) spectrum of compound **8**

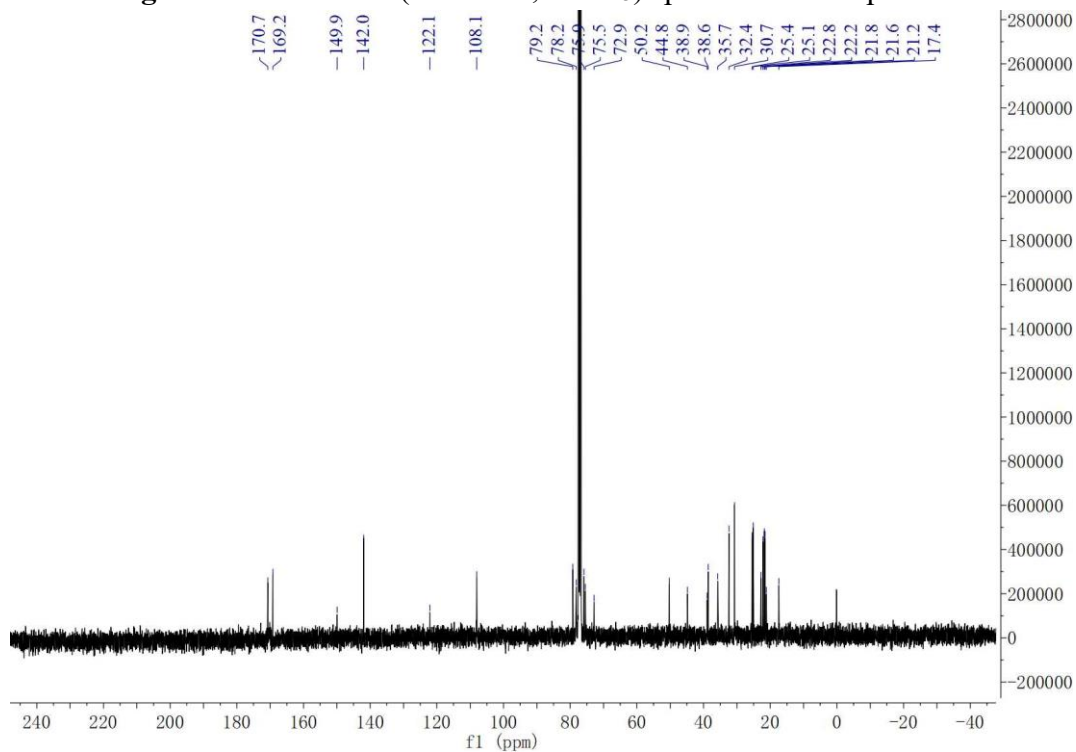

**Figure S59.**  $^{13}\text{C}$  NMR (100 MHz,  $\text{CDCl}_3$ ) spectrum of compound **8**

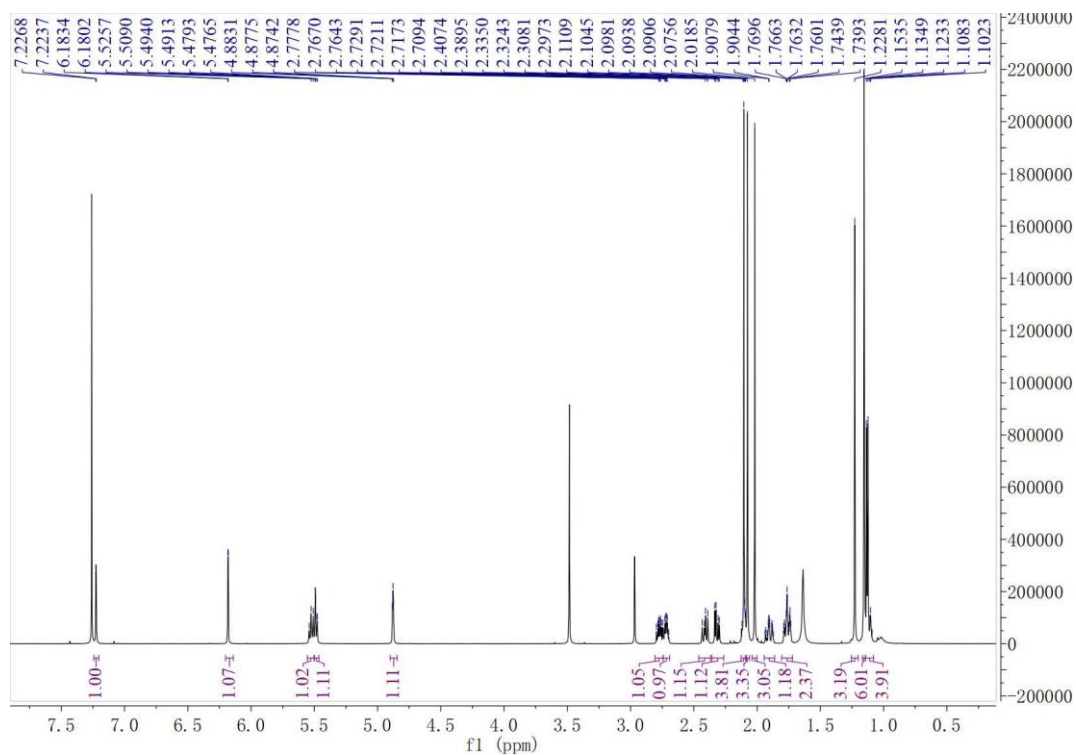

**Figure S60.**  $^1\text{H}$  NMR (600 MHz,  $\text{CDCl}_3$ ) spectrum of compound **9**

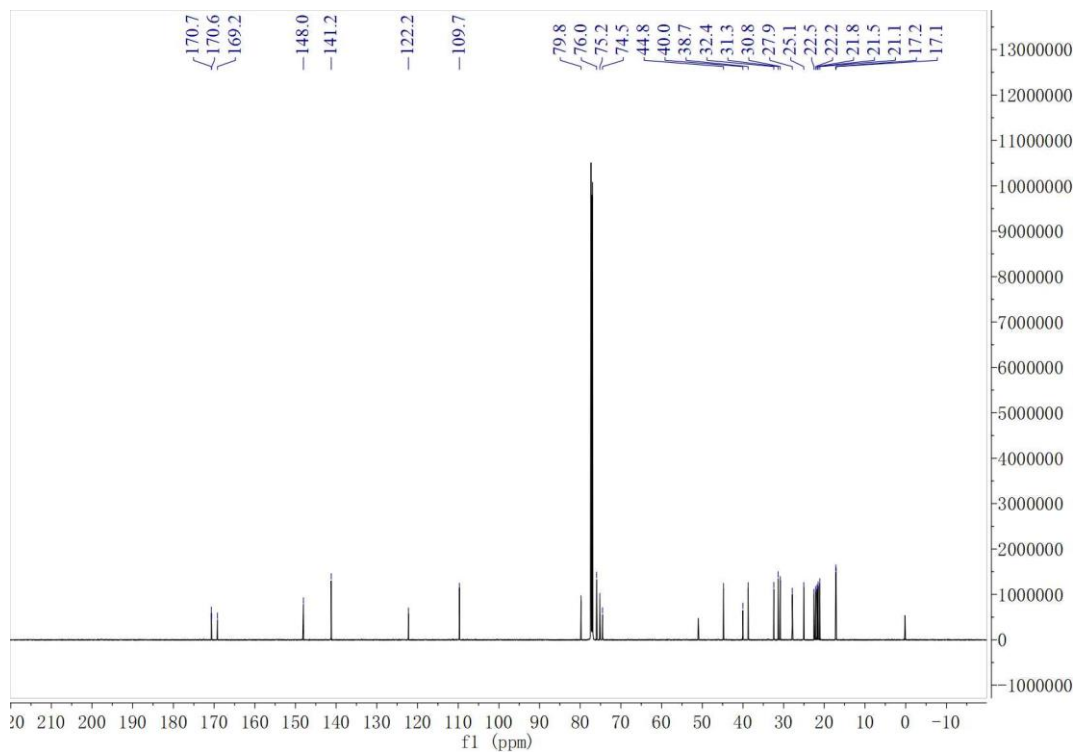

**Figure S61.**  $^{13}\text{C}$  NMR (150 MHz,  $\text{CDCl}_3$ ) spectrum of compound **9**

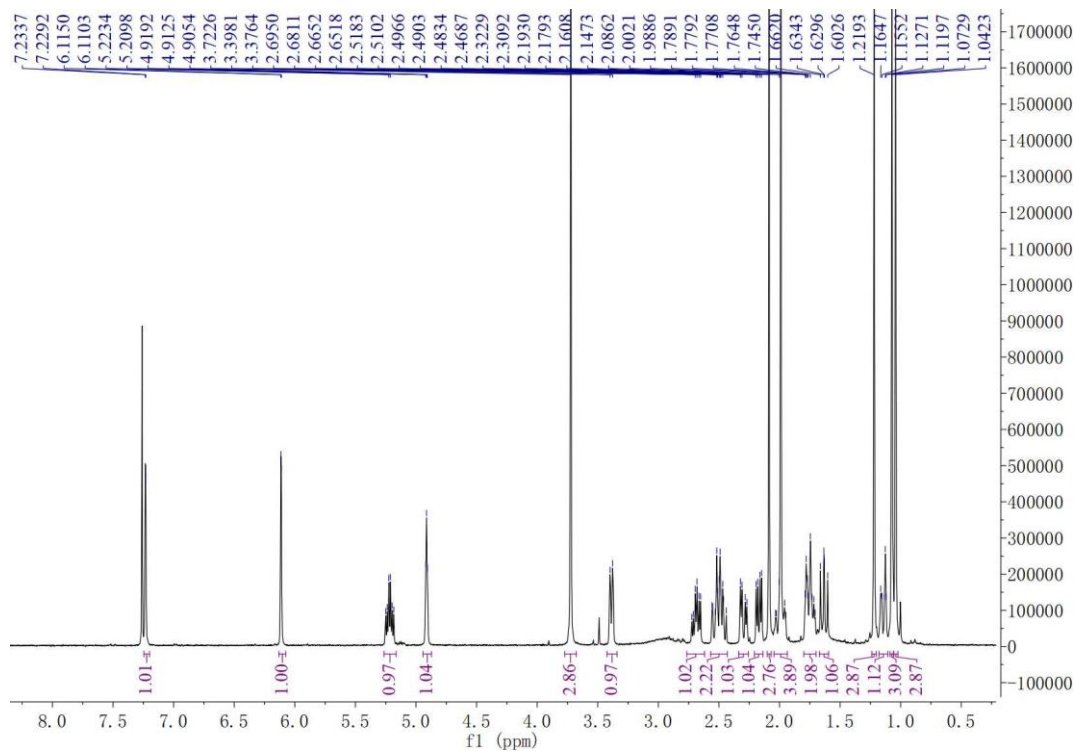

**Figure S62.**  $^1\text{H}$  NMR (400 MHz,  $\text{CDCl}_3$ ) spectrum of compound **10**

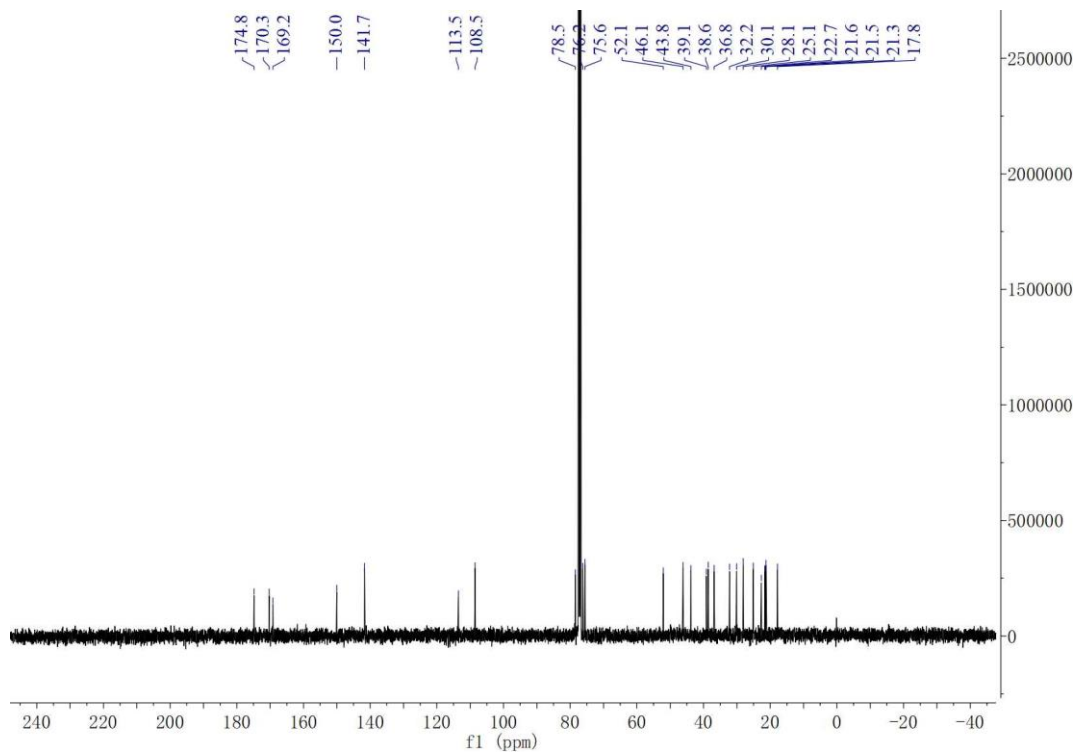

**Figure S63.**  $^{13}\text{C}$  NMR (100 MHz,  $\text{CDCl}_3$ ) spectrum of compound **10**

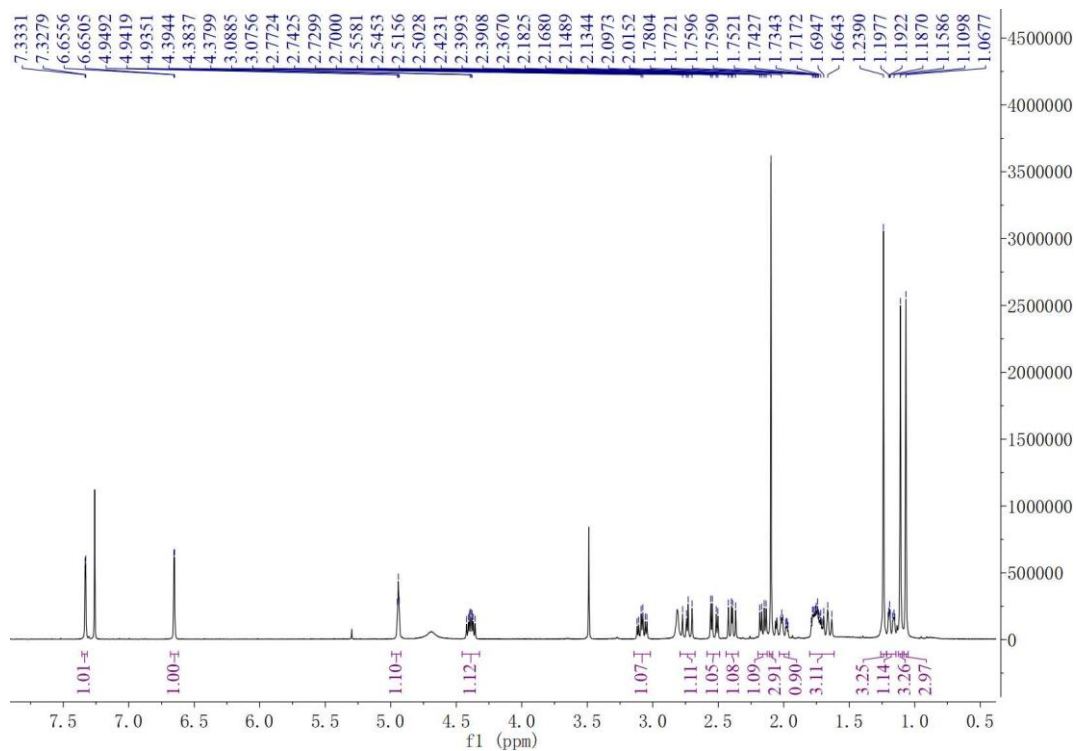

**Figure S64.**  $^1\text{H}$  NMR (400 MHz,  $\text{CDCl}_3$ ) spectrum of compound **11**

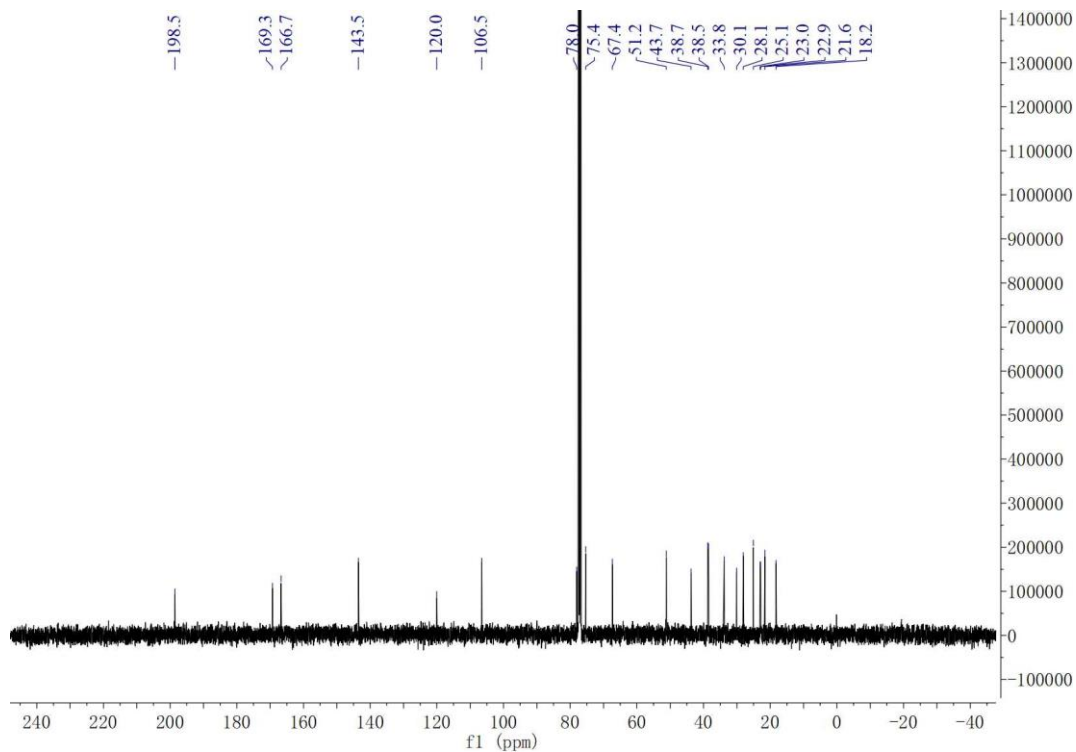

**Figure S65.**  $^{13}\text{C}$  NMR (100 MHz,  $\text{CDCl}_3$ ) spectrum of compound **11**
